1 **Effects of more natural housing conditions on the muscular and skeletal**  
2 **characteristics of female C57BL/6J mice**

3 Paul Mieske<sup>1,\*</sup>, Julia Scheinpflug<sup>1</sup>, Timur Alexander Yorgan<sup>2</sup>, Laura Brylka<sup>2</sup>, Rupert Palme<sup>3</sup>,  
4 Ute Hobbiesiefken<sup>1</sup>, Juliane Preikschat<sup>1</sup>, Kai Diederich<sup>1</sup>, Lars Lewejohann<sup>1,4</sup>

5 <sup>1</sup>German Center for the Protection of Laboratory Animals (Bf3R), Federal German Institute for Risk Assessment  
6 (BfR), Max-Dohrn-Str. 8-10, 10589 Berlin, Germany

7 <sup>2</sup>Department of Osteology and Biomechanics, University Medical Center Hamburg-Eppendorf, Martinistraße  
8 52, 20246 Hamburg, Germany

9 <sup>3</sup>Unit of Physiology, Pathophysiology, and Experimental Endocrinology, University of Veterinary Medicine  
10 Vienna, Veterinärplatz 1, 1210 Vienna, Austria

11 <sup>4</sup>Animal Behavior and Laboratory Animal Science, Institute of Animal Welfare, Freie Universität Berlin,  
12 Königsweg 67, 14163 Berlin, Germany

13 \* corresponding author

14

15

16

17

18

19

20

21

22

23 **Abstract**

24 **Background:** Enrichment of home cages in laboratory experiments offers clear advantages, but has  
25 been criticized in some respects. First, there is a lack of definition, which makes methodological  
26 uniformity difficult. Second, there is concern that the enrichment of home cages may increase the  
27 variance of results in experiments. Here, the influence of more natural housing conditions on  
28 physiological parameters of female C57BL/6J mice was investigated from an animal welfare point of  
29 view. For this purpose, the animals were kept in three different housing conditions: conventional  
30 cage housing, enriched housing and the semi-naturalistic environment. The focus was on  
31 musculoskeletal changes after long-term environmental enrichment.

32 **Results:** The housing conditions had a long-term effect on the body weight of the test animals. The  
33 more complex and natural the home cage, the heavier the animals. This was associated with  
34 increased adipose deposits in the animals. There were no significant changes in muscle and bone  
35 characteristics except for single clues (femur diameter, bone resorption marker CTX-1). Additionally,  
36 the animals in the semi naturalistic environment (SNE) were found to have the fewest bone  
37 anomalies. Housing in the SNE appears to have the least effect on stress hormone concentrations.  
38 The lowest oxygen uptake was observed in enriched cage housing.

39 **Conclusions:** Despite increasing values, observed body weights were in the normal and strain-typical  
40 range. Overall, musculoskeletal parameters were slightly improved and age-related effects appear to  
41 have been attenuated. The variances in the results were not increased by more natural housing. This  
42 confirms the suitability of the applied housing conditions to ensure and increase animal welfare in  
43 laboratory experiments.

44 **Keywords**

45 animal welfare, mice, physiology, musculoskeletal characteristics, body weight, environmental  
46 enrichment, semi naturalistic environment

47

48 **1. Background**

49 Enrichment of the housing conditions of laboratory animals is not subject to any universal principles  
50 and therefore takes different forms (1). In general, increased provision of stimuli to enable natural  
51 behavior and improve animal welfare could be a definition of environmental enrichment (EE). In fact,  
52 many comparative studies on the impact of EE on laboratory mice show effects on animal welfare  
53 (2). The majority of studies conclude that the use of EE is beneficial for the animals. Housing in  
54 enriched environments can reduce stereotypies (3–7), reduce anxiety (8–10) and promote  
55 exploratory behavior (11,12), as well as promote the development of favorable physiological  
56 parameters, especially in the neurological field (13,14). It is also important that the enrichment is  
57 versatile and easily accessible. Dispersed enrichment using different elements or larger enclosures  
58 has the potential to minimize aggression between individuals in a group (15). Despite the clear  
59 advantages of using EE, the minimum legal requirements for standard laboratory husbandry  
60 unfortunately remain unchanged. In most experimental studies the cages continue to be only  
61 minimally equipped and thus constitute a barren environment. A recent meta-analysis has shown  
62 that such barren housing conditions in biomedical translational studies can negatively affect a  
63 number of health parameters in the experimental animals, thus substantially compromising the  
64 validity of these studies (16).

65 However, mandating enrichment of laboratory animal cages it is not an easy endeavor, as a number  
66 of factors must be considered for implementation. Laboratories and breeding facilities need to gauge  
67 which EE elements can be added, minding the applicability and financial feasibility. When introducing  
68 EE elements, hygiene standards for the animals must be maintained and standardization between  
69 experiments and laboratories must not be compromised (17). Finally, an increasing individualization  
70 of the cage design according to one's own views, experiences, and tastes may affect the  
71 comparability of methods and results.

72 Another major criticism on the use of EE is the fear that the emergence of individual differences of  
73 experimental animals promoted by EE results in increased variability. However, previous studies have

74 shown that the use of EE emphasizes individuality without necessarily increasing the variability of  
75 physiological parameters (18,19). Providing simple enrichments such as additional nesting material  
76 and plastic or cardboard tunnels over long periods can change social behavior, but do not necessarily  
77 affect physiological parameters (20). A further advance to enriching conventional housing conditions  
78 of laboratory animals is to design an environment that resembles nature. However, even the use of a  
79 semi-natural environment that promotes individual diversified behavior did not result in greater  
80 deviations in the measurement of physiological parameters compared to conventional studies  
81 (21,22).

82 Only by gaining more knowledge and disclosing additional benefits of EE is it possible to increase  
83 awareness and acceptance of the need to use EE, which ultimately also leads to an increase in overall  
84 animal welfare.

85 An example of a suitable method of laboratory cage enrichment was recently presented by  
86 Hobbiesiefken *et al.* (3). By exchanging enrichment elements in different categories on a weekly  
87 basis, an EE concept was developed, that reduced stereotypies and served to evaluate individual  
88 enrichment elements through behavioral observations. In the present study, three housing  
89 conditions with increasing opportunities to exhibit more natural behavior were used to analyze  
90 effects on physiological parameters. In addition to the conventional and enriched housing conditions  
91 used by Hobbiesiefken *et al.* a semi-natural environment (21–27) was used to exploit the full  
92 potential of the mice's natural behavior as much as possible. Since many previous studies focus more  
93 on animal behavior than on uncovering the effects of EE on physiological traits, we here analyze  
94 whether the use of objects, social enrichment, or larger enclosure space affects musculoskeletal  
95 characteristics of female C57BL/6J mice. Nevertheless, our analysis of musculoskeletal characteristics  
96 was conducted within the framework of the animal welfare perspective. Additionally, to be able to  
97 monitor changes in animal welfare on a more obvious and holistic level, body weight, resting  
98 metabolic rate and stress hormone levels were measured. With regard to biomedical studies it might  
99 be under consideration, whether an increase or decrease of the respective parameter is the desired

100 outcome. We admit that it might be questionable whether an altered muscle weight or bone density  
101 is ultimately decisive for improved animal welfare. However, one could assume that the physiological  
102 parameters we measured under more challenging environmental conditions are a better  
103 representation of the natural state. When considering effects on human bone structure, twin-studies  
104 are used to distinguish between genetic and environmental influences. It has already been  
105 established that in humans up to 70% of individual differences are of genetic origin (28,29). In  
106 laboratory mice, genetic variability can be controlled. Thus, to pay greater attention to the influence  
107 of environmental enrichment on muscle and skeletal properties, inbred mouse strains are  
108 particularly suitable, since virtually an unlimited number of genetically identical individuals are  
109 available. Nonetheless, it has been shown that individual differences emerge despite genetic  
110 uniformity even in strictly standardized and limited housing conditions (30). Albeit genetics and  
111 housing conditions are not exclusive factors that should be considered for the evaluation.

## 112 **2. Results**

### 113 2.1. Weight data

114 On arrival, the experimental animals weighed  $19.8 \pm 0.9$  g (4.5 %, 22.5 – 17.2 g, n = 44). During the  
115 experimental period of 88 weeks animal weight increased significantly ( $F(1|3604) = 7716$ , p-value <  
116 0.001,  $R^2 = 0.68$ ). A mixed model applied to the data confirmed that weight increased over time and  
117 is influenced by the individual animal, the housing condition and the time as a random effect and by  
118 the individual animal within the different housing condition and the individual animal over time as  
119 nested random effects. The applied model explains the variance of the data significantly better than  
120 a model that ignores the housing condition and time as predictors ( $p < 0.001$ ). The different  
121 influences on the weight resulted in animals living in the SNE being the heaviest and the animals  
122 living in the CON being the lightest (**Figure 1 A**). At the time of perfusion of the animals they showed  
123 a mean animal weight in CON housing of  $30.4 \pm 3.1$  g (10.1 %, 36.1 – 26.1 g, n = 11), in ENR housing of  
124  $33.5 \pm 3.1$  g (9.2 %, 40.5 – 29.8 g, n = 11) and in SNE housing of  $34.6 \pm 3.1$  g (8.9 %, 40.0 – 28.4 g, n =

125 18, **Figure 1 B**). Animals in SNE housing were significantly heavier than the animals in CON housing.  
126 The weight increase from CON to ENR housing was marginally not significant. There was no  
127 significant difference between ENR and SNE housing.  
128 In order to be able to map the physical characteristics more accurately, the length of experimental  
129 animals was also measured and placed into relation with the animal weight. The animal length in  
130 CON housing was  $9.7 \pm 0.3$  cm (2.8 %, 10.3 – 9.3 cm, n = 11), in ENR housing  $10.1 \pm 0.2$  cm (2.2 %,  
131 10.5 – 9.8 cm, n = 10) and in SNE housing  $10.3 \pm 0.2$  cm (2.1 %, 10.8 – 9.9 cm, n = 18, **Figure 1 B**).  
132 Comparable to the body weight ENR and SNE animals were significantly longer than CON animals  
133 with no significant difference between them. The ratio of animal weight to animal length in CON  
134 housing resulted to  $3.1 \pm 0.3$  g cm<sup>-1</sup> (8.2 %, 3.5 – 2.8 g cm<sup>-1</sup>, n = 11), in ENR housing to  $3.3 \pm 0.4$  g cm<sup>-1</sup>  
135 (10.9 %, 3.9 – 2.6 g cm<sup>-1</sup>, n = 11) and in SNE housing to  $3.3 \pm 0.3$  g cm<sup>-1</sup> (8.7%, 4 – 2.8 g cm<sup>-1</sup>, n = 18,  
136 **Figure 1 B**). Overall, the same trend as in body weight and length was revealed, but no significant  
137 differences.

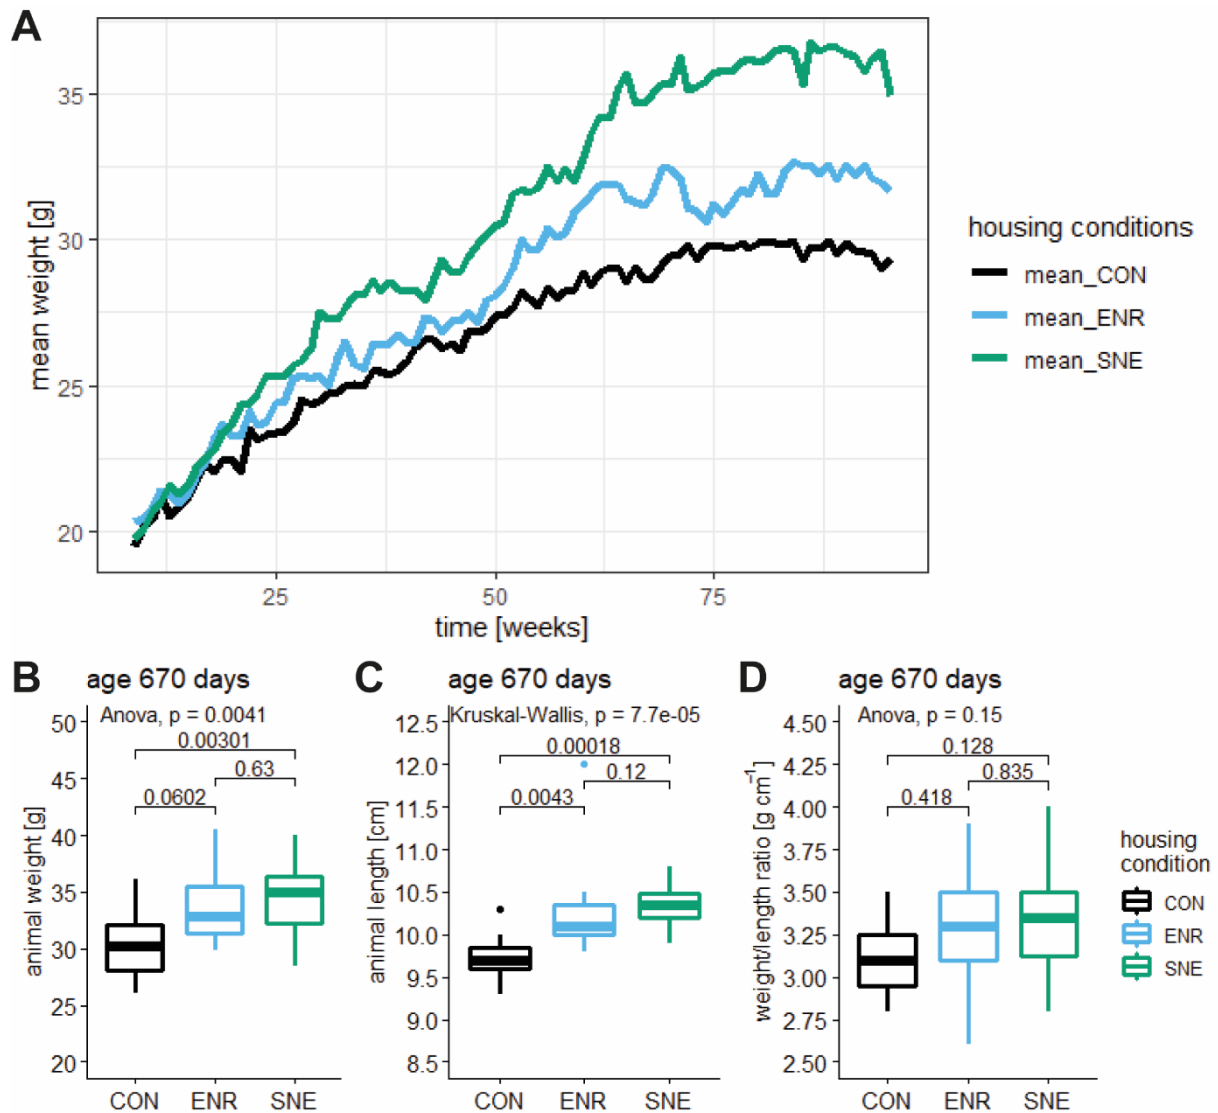

138

139 **Figure 1.** Line plot and boxplots of the physical parameters weight and body length of female C57BL/6J mice from the  
 140 three different housing conditions. A – mean body weight over time with CON housing in black, ENR housing in light blue  
 141 and SNE housing in green. B – mean body weight at the day of perfusion (age 670 days, same coloring scheme as A) with  
 142 respective  $p$  values from a post hoc Tukey test. C – mean animal length at the day of perfusion (age 670 days, colors equal  
 143 to A) with respective  $p$  values from a post hoc Wilcoxon test. D – mean ratio of animal weight to animal length at the day of  
 144 perfusion (age 670 days, same coloring scheme as A) with respective  $p$  values from a post hoc Tukey test.

## 145 2.2. Adipose tissue weight

146 At the time of perfusion, retroperitoneal adipose tissue weight for animals in the CON housing was  
 147  $0.057 \pm 0.032$  g (56.8 %, 0.127 – 0.030 g,  $n = 11$ ), for ENR housing  $0.076 \pm 0.019$  g (25.3 %, 0.092 –  
 148  $0.037$  g,  $n = 10$ ) and for SNE housing  $0.112 \pm 0.048$  g (43.1 %, 0.201 – 0.020 g,  $n = 18$ , **Figure 2 A**). For

149 periovarian adipose tissue weight animals in CON housing showed  $0.276 \pm 0.157$  g (56.9 %, 0.593 –  
 150 0.020 g, n = 11), for ENR housing  $0.409 \pm 0.182$  g (44.5 %, 0.798 – 0.184 g, n = 11) and for SNE  
 151 housing  $0.506 \pm 0.236$  g (46.6 %, 1.053 – 0.127 g, n = 18, **Figure 2 B**). For both tissues SNE animals  
 152 showed significant heavier adipose tissue weights than CON animals. There was no statistical  
 153 difference between CON and ENR animals nor ENR and SNE animals. The weights of the adipose  
 154 tissues in relation to the body weight of the mice were in the same proportion to each other. The  
 155 percentage of retroperitoneal and periovarian adipose tissue increased significantly from the CON  
 156 housing to the SNE housing.

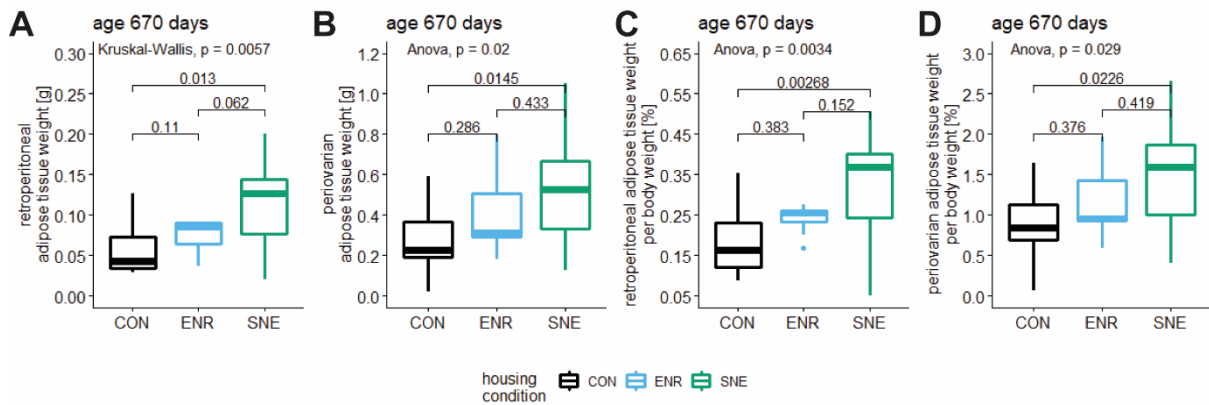

157

158 **Figure 2. Boxplot of adipose tissue weight and adipose tissue weight relative to animal body weight of female C57BL/6J**  
 159 **mice at the time of perfusion (age 670 days).** A – retroperitoneal adipose tissue weights of animals in CON housing (black),  
 160 ENR housing (light blue) and SNE housing (green) after perfusion at an age of 670 days with respective *p* values from post  
 161 hoc Wilcoxon test. B – periovarian adipose tissue weights (same coloring scheme) after perfusion at an age of 670 days with  
 162 the respective *p* values from post hoc Tukey test. C – retroperitoneal adipose tissue weights relative to animal body weight  
 163 (same coloring scheme) after perfusion at an age of 670 days with respective *p* values from post hoc Tukey test. D –  
 164 periovarian adipose tissue weights relative to animal body weight (same coloring scheme) after perfusion at an age of 670  
 165 days with the respective *p* values from post hoc Tukey test.

### 166 2.3. Bone density and structural properties data

167 To observe the change of the bone density over time, it was measured at three different ages of  
 168 female C57BL/6J mice during housing in different conditions. At an age of 340 days the mice showed  
 169 a bone density in CON housing of  $1.51 \pm 0.24$  g cm<sup>-3</sup> (15.6 %, 1.81 – 0.98 g cm<sup>-3</sup>, n = 11), in ENR



170 housing of  $1.69 \pm 0.17 \text{ g cm}^{-3}$  (16.5 %,  $1.90 - 1.42 \text{ g cm}^{-3}$ ,  $n = 12$ ) and in SNE housing of  $1.72 \pm 0.16 \text{ g}$   
171  $\text{cm}^{-3}$  (16.0 %,  $1.92 - 1.35 \text{ g cm}^{-3}$ ,  $n = 20$ , **Figure 3 A**). Both animals in ENR and SNE housing had a  
172 significantly higher bone density than the control animals, but showed no statistical difference  
173 between the two enriched housing conditions. At an age of 501 days the bone density values  
174 decreased to  $1.44 \pm 0.15 \text{ g cm}^{-3}$  (10.6 %,  $1.63 - 1.16 \text{ g cm}^{-3}$ ,  $n = 11$ ) in CON housing,  $1.58 \pm 0.19 \text{ g cm}^{-3}$   
175 ( $12.0 \%$ ,  $1.87 - 1.25 \text{ g cm}^{-3}$ ,  $n = 10$ ) in ENR housing and  $1.57 \pm 0.23 \text{ g cm}^{-3}$  ( $14.4 \%$ ,  $2.09 - 1.36 \text{ g cm}^{-3}$ ,  
176  $n = 19$ , **Figure 3 A**) in SNE housing. The difference between the three housing conditions was not  
177 statistically significant anymore. Bone density showed further degeneration at an age of 664 days with  
178  $1.21 \pm 0.13 \text{ g cm}^{-3}$  (10.8 %,  $1.44 - 1.02 \text{ g cm}^{-3}$ ,  $n = 11$ ) for CON animals,  $1.38 \pm 0.25 \text{ g cm}^{-3}$  (17.8 %,   
179  $1.92 - 1.06 \text{ g cm}^{-3}$ ,  $n = 11$ ) for ENR animals and  $1.35 \pm 0.16 \text{ g cm}^{-3}$  (12.2 %,  $1.68 - 1.05 \text{ g cm}^{-3}$ ,  $n = 17$ ,  
180 **Figure 3**) for SNE animals. Analysis showed no significant difference although the relation between  
181 values showed a trend comparable to the first measurement at 340 days of age.  
182 A linear model confirmed the significant decrease of bone density over time ( $F(2 | 120) = 27.41$ ,  $p$ -  
183 value  $< 0.001$ ,  $R^2 = 0.30$ ). The observation of a lower bone density at a higher age of female C57BL/6J  
184 mice was mostly influenced by the housing condition as a random factor (model 1). A mixed effect  
185 model without housing condition as a random factor (model 2) was significantly less adequate to  
186 describe the data ( $p = 0.016$ , model 1 AIC = -44.35, model 2 AIC = -40.62)). However, a comparison  
187 with housing condition alone as a random factor (model 3) showed no significant difference ( $p =$   
188 0.24).

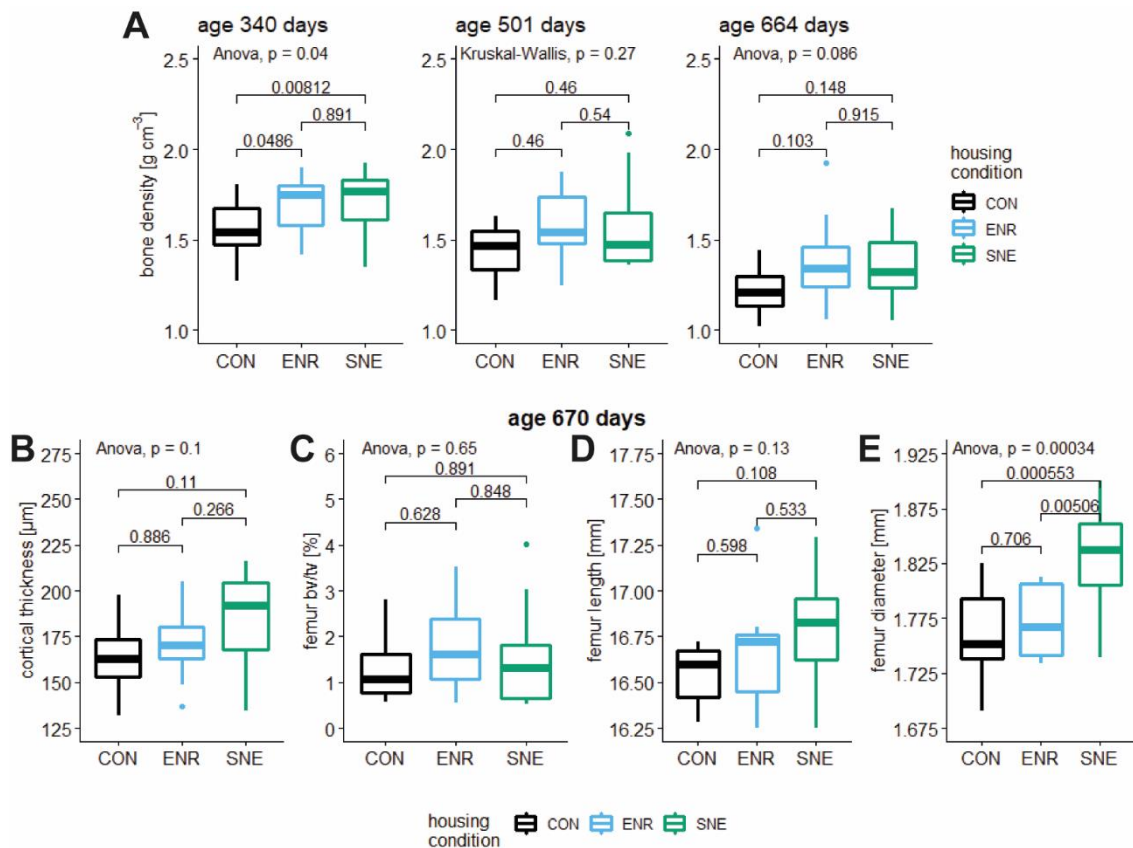

189

190 **Figure 3. Bone density at three different ages and structural femur properties of female C57BL/6J mice in three different**  
 191 **housing conditions.** A – bone density in  $\text{g cm}^{-3}$  at the age of 340, 501 and 664 days of animals in CON housing (black), ENR  
 192 housing (light blue) and SNE housing (green) with respective  $p$  values from post hoc Tukey (A left and right) and Wilcoxon (A  
 193 middle) test. B–E – parameters were measured after perfusion at an age of 670 days in CON housing (black, ENR housing  
 194 (light blue) and SNE housing (green). B – cortical thickness in  $\mu\text{m}$  with respective  $p$  values from post hoc Tukey test. C –  
 195 femur bone volume per tissue volume in % with respective  $p$  values from post hoc Tukey test. femur midshaft outer  
 196 diameter in mm with respective  $p$  values from post hoc Tukey test. D – femur length in mm with respective  $p$  values from  
 197 post hoc Tukey test. E – femur midshaft outer diameter in mm with respective  $p$  values from post hoc Tukey test.

198 In addition to the bone density, detailed properties of the bone structure were determined via  $\mu\text{CT}$   
 199 analysis. The examination of the macroscopic compartments of the bone revealed a cortical  
 200 thickness of the femur for female C57BL/6J mice in CON housing of  $164.4 \pm 23.2 \mu\text{m}$  (14.1 %, 197.4 –  
 201  $132.1 \mu\text{m}$ ,  $n = 9$ ), in ENR housing  $169.5 \pm 19.7 \mu\text{m}$  (11.6 %, 205.3 –  $136.7 \mu\text{m}$ ,  $n = 9$ ) and in SNE  
 202 housing  $185.5 \pm 24.5 \mu\text{m}$  (13.2 %, 216.2 –  $134.6 \mu\text{m}$ ,  $n = 12$ , **Figure 3 B**). SNE animals showed the  
 203 highest cortical thickness but the difference between the housing conditions was not significant. The  
 204 ratio of trabecular bone volume to tissue volume was the lowest in CON housing with  $1.32 \pm 0.78 \%$

205 (59.0 %, 2.81 – 0.57 %, n = 8). The highest bv/tv was measured for ENR housing with  $1.78 \pm 1.09$  %  
206 (61.1 %, 3.52 – 0.55 %, n = 9). Animals in SNE housing showed bv/tv of  $1.53 \pm 1.10$  % (71.8 %, 4.01 –  
207 0.51 %, n = 18, **Figure 3 C**). The differences between the groups were not significant.

208 The femur length for the experimental animals in CON housing was  $16.55 \pm 0.15$  mm (0.9 %, 16.72 –  
209 16.28 mm, n = 9), was increased in ENR housing with  $16.67 \pm 0.32$  mm (1.9 %, 17.34 – 16.25 mm, n =  
210 9) and reached the highest value in SNE housing with  $16.79 \pm 0.28$  mm (1.7 %, 17.29 – 16.25 mm, n =  
211 11, **Figure 3 D**). The increase in length with the rising level of enrichment was not significant.

212 Comparable to the femur length, the femur midshaft outer diameter was also increased in ENR and  
213 SNE housing. In CON housing the diameter was  $1.76 \pm 0.04$  mm (2.3 %, 1.83 – 1.69 mm, n = 9), in ENR  
214 housing  $1.77 \pm 0.03$  mm (1.8 %, 1.81 – 1.73 mm, n = 9) and in SNE housing  $1.83 \pm 0.04$  mm (2.3 %,  
215 1.90 – 1.74 mm, n = 12, **Figure 3 E**). The mean diameter in SNE housing was significantly higher than  
216 the diameter in animals in CON and ENR housing.

217 Additional structural properties are mentioned in table (see 3.9. data summary). Respective figures  
218 are shown in supplements figure S1. In summary, no significant differences were found in the femora  
219 for cortical porosity, trabecular thickness, number and separation.

220 Structural bone anomalies were found in animals of every housing condition. In percentage terms,  
221 SNE housing showed the lowest number of animals with anomalies (**Figure 4 D**). In CON housing  
222 every individual showed at least one atypical feature (**Figure 4 B and C**). The effect of housing  
223 condition on the percentage of animals with anomalies was not significant. On average, the animals  
224 in ENR housing had 2.2 anomalies per individual animal. CON housing showed only slightly less with  
225 1.9 anomalies per animal whereas animals in SNE housing on average showed 1.0 anomaly per  
226 individual (**Figure 4 E**). Relative to the number of individuals in the housing conditions, SNE housing  
227 resulted in the fewest anomalies.

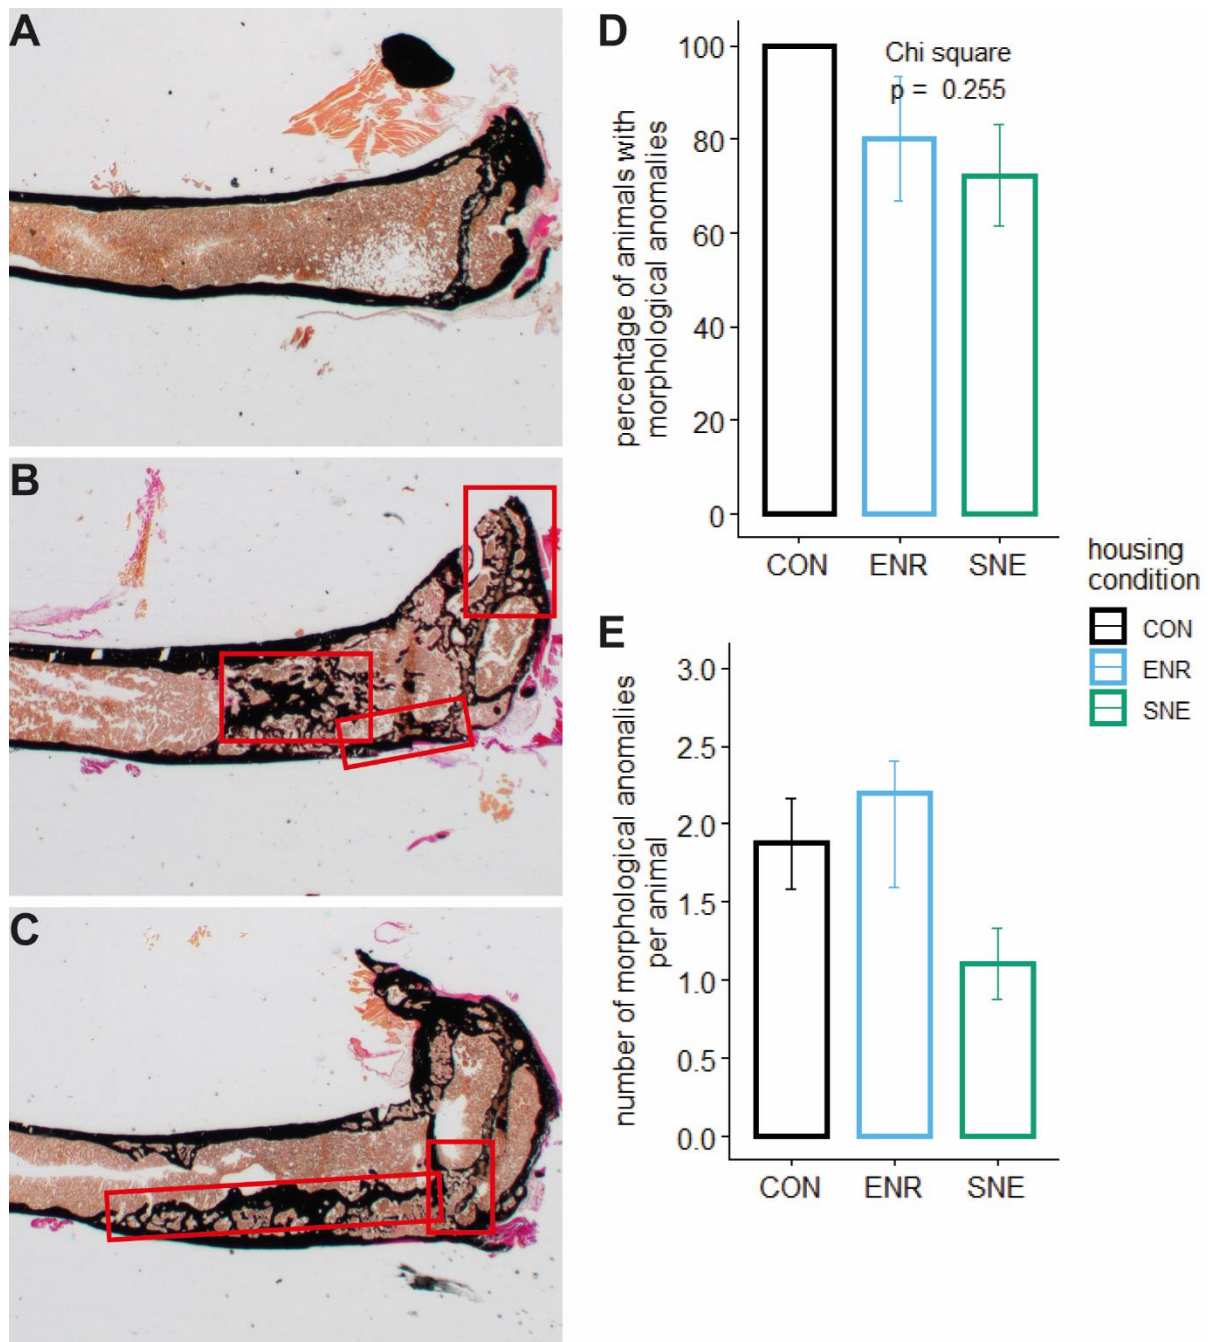

228

229 **Figure 4. Examples of Kossa stained tibia sections (2.5x) of female C57BL/6J mice and bar plots of the occurrence of**  
230 **anomalies in their bone structure.** A – example for no anomalies in the tibia section. B – example for trabecularized cortical  
231 bone, mineralized lesions and anomalous trabecular localization in the tibia (here: epiphysis). C – example for  
232 pseudocortical structures within the medullar cavity and the partial disruption of the growth plate. D – bar plot of the  
233 percentage of animals within each housing condition CON (black), ENR (light blue) and SNE (green), that showed  
234 morphological anomalies with the respective p value from a  $\chi^2$  test. E – bar plot of the number of morphological anomalies  
235 per animal within the three housing conditions (same coloring scheme).

236

## 237 2.4. Grip strength data

238 The grip strength of female C57BL/6J mice was measured at two times during their housing period.

239 At an age of 508–510 days the mice showed a grip strength in CON housing of  $2.29 \pm 0.39$  N (17.0 %, 3.26 – 1.78 N, n = 10), in ENR housing  $2.60 \pm 0.41$  N (15.6 %, 3.23 – 1.99 N, n = 12) and in SNE housing

240  $2.38 \pm 0.35$  N (14.5 %, 3.29 – 1.89 N, n = 19, **Figure 5**). Mice in ENR housing showed the highest grip

241 strength in comparison to the animals of the other housing conditions. The difference is not

242 significant. In the second measurement at an age of 664 days animals showed in CON housing  $2.34 \pm$

243  $0.43$  N (18.4 %, 3.00 – 1.71 N, n = 11), in ENR housing  $2.65 \pm 0.26$  N (9.8 %, 3.04 – 2.21 N, n = 12) and

244 in SNE housing  $2.40 \pm 0.40$  N (16.6 %, 3.09 – 1.85 N, n = 18, **Figure 5**). The relationship between values

245 has not changed and was still not significant. Also a linear model showed no significant change of the

246 grip strength between the two measurements ( $F(1|79) = 0.095$ , p-value = 0.76,  $R^2 = -0.01$ ).

247

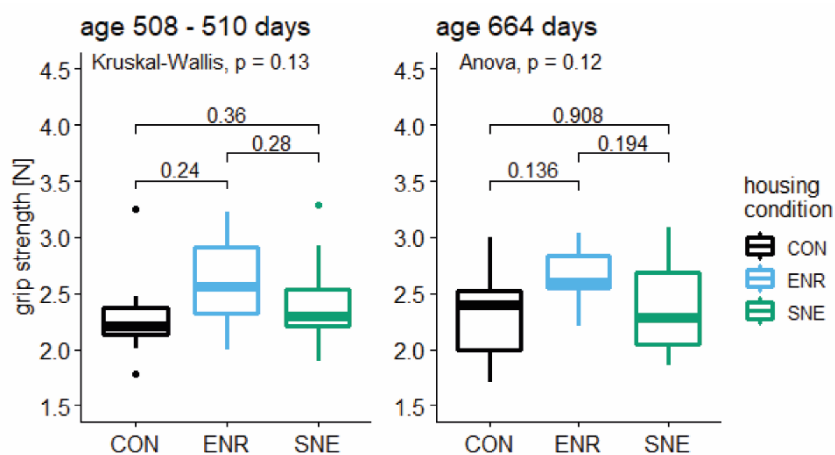

248

249 **Figure 5. Boxplots of the grip strength of female C57BL/6J mice at two different times during housing in there different**

250 **conditions.** Left boxplot – grip strength at an age of 508–510 days of animals in CON housing (black), ENR housing (light

251 blue) and SNE housing (green) with respective p values from post hoc Wilcoxon test. Right boxplot – grip strength at an age

252 of 664 days (same coloring scheme) with respective p values from post hoc Tukey test.

## 253 2.5. Muscle weight data

254 After perfusion of the animals at an age of 670 days the muscle weight of the musculus biceps

255 femoris was measured. For CON housing animals showed a muscle weight of  $0.123 \pm 0.023$  g (19.0 %, 0.173 – 0.073 g, n = 10), in ENR housing  $0.131 \pm 0.023$  g (15.6 %, 0.173 – 0.073 g, n = 12) and in SNE housing  $0.123 \pm 0.023$  g (14.5 %, 0.173 – 0.073 g, n = 19, **Figure 5**). Mice in ENR housing showed the highest muscle weight in comparison to the animals of the other housing conditions. The difference is not significant. In the second measurement at an age of 664 days animals showed in CON housing  $0.123 \pm 0.023$  g (18.4 %, 0.173 – 0.073 g, n = 11), in ENR housing  $0.131 \pm 0.023$  g (9.8 %, 0.173 – 0.073 g, n = 12) and in SNE housing  $0.123 \pm 0.023$  g (16.6 %, 0.173 – 0.073 g, n = 18, **Figure 5**). The relationship between values has not changed and was still not significant. Also a linear model showed no significant change of the muscle weight between the two measurements ( $F(1|79) = 0.095$ , p-value = 0.76,  $R^2 = -0.01$ ).

256 0.161 – 0.097 g, n = 11), for ENR housing  $0.127 \pm 0.021$  g (16.5 %, 0.166 – 0.097 g, n = 11) and for SNE  
257 housing  $0.120 \pm 0.020$  g (16.3 %, 0.161 – 0.087 g, n = 18, **Figure 6**). Animals in the ENR housing  
258 showed the highest muscle weight. There was no significant difference between housing conditions.  
259 Muscle weight in relation to body weight decreased significantly from the CON housing to the ENR  
260 housing to the SNE housing. However, the individual comparison between the housing conditions did  
261 not show any significant differences.

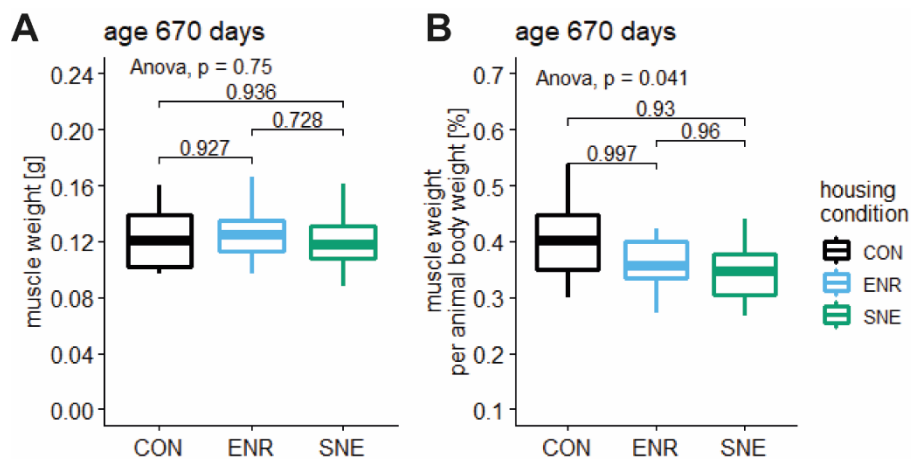

262

263 **Figure 6.** Boxplot of muscle weight in g (A) and muscle weight relative to animal body weight in % (B) of female C57BL/6J  
264 mice in three different housing conditions (CON housing in black, ENR housing in light blue and SNE housing in green). The  
265 parameter was measured after the perfusion at the age of 670 days and is displayed with the respective *p* values from a  
266 post hoc Tukey test.

## 267 2.6. Bone turnover parameter data

268 Three musculoskeletal turnover parameters were measured in blood samples after the perfusion of  
269 female C57BL/6J mice at an age of 670 days. Myostatin is an endogenous protein that inhibits muscle  
270 growth. The myostatin concentration for animals in CON housing was  $692.26 \pm 132.87$  pg ml<sup>-1</sup> (19.2  
271 %, 952.38 – 466.68 pg ml<sup>-1</sup>, n = 11), in ENR housing  $714.96 \pm 107.04$  pg ml<sup>-1</sup> (15.0 %, 796.48 – 584.37  
272 pg ml<sup>-1</sup>, n = 5) and in SNE housing  $692.26 \pm 132.87$  pg ml<sup>-1</sup> (19.2 %, 952.38 – 466.68 pg ml<sup>-1</sup>, n = 18,  
273 **Figure 7**). There was no significant difference in the myostatin concentration between the three  
274 housing conditions.

275 Osteocalcin is a component of the extracellular non-collagenous bone matrix and serves to  
276 mineralize bone during new bone formation or healing. In mice osteocalcin also stimulates insulin  
277 secretion and thus lipolysis. The osteocalcin concentration in CON housing was  $4.77 \pm 3.67$  ng ml<sup>-1</sup>  
278 (77.0 %, 14.15 – 1.90 ng ml<sup>-1</sup>, n = 11), lower in ENR housing with  $4.48 \pm 2.96$  ng ml<sup>-1</sup> (66.1 %, 8.95 –  
279 1.70 ng ml<sup>-1</sup>, n = 9) and slightly increased in SNE housing with  $5.18.26 \pm 2.79$  ng ml<sup>-1</sup> (53.8 %, 9.91 –  
280 1.47 ng ml<sup>-1</sup>, n = 17, **Figure 7**). Comparable to the relation in the values for the myostatin  
281 concentration, no significant difference was found.  
282 C-terminal telopeptides are metabolic products of collagen and represent a suitable marker for bone  
283 resorption. An elevated CTX-1 level indicates a reduced bone turnover. The results for the CTX-1  
284 concentration showed a more distinct relationship. In CON housing CTX-1 concentration was the  
285 highest with  $32.97 \pm 7.20$  ng ml<sup>-1</sup> (21.8 %, 43.08 – 23.15 ng ml<sup>-1</sup>, n = 10). With no significant difference  
286 to CON housing, concentration for animals in ENR housing was  $31.00 \pm 7.80$  ng ml<sup>-1</sup> (25.2 %, 41.41 –  
287 18.14 ng ml<sup>-1</sup>, n = 9). SNE housing lead to a significantly lower CTX-1 concentration in comparison to  
288 CON and ENR housing with  $24.77 \pm 4.38$  ng ml<sup>-1</sup> (17.7 %, 31.49 – 14.71 ng ml<sup>-1</sup>, n = 18, **Figure 7**).

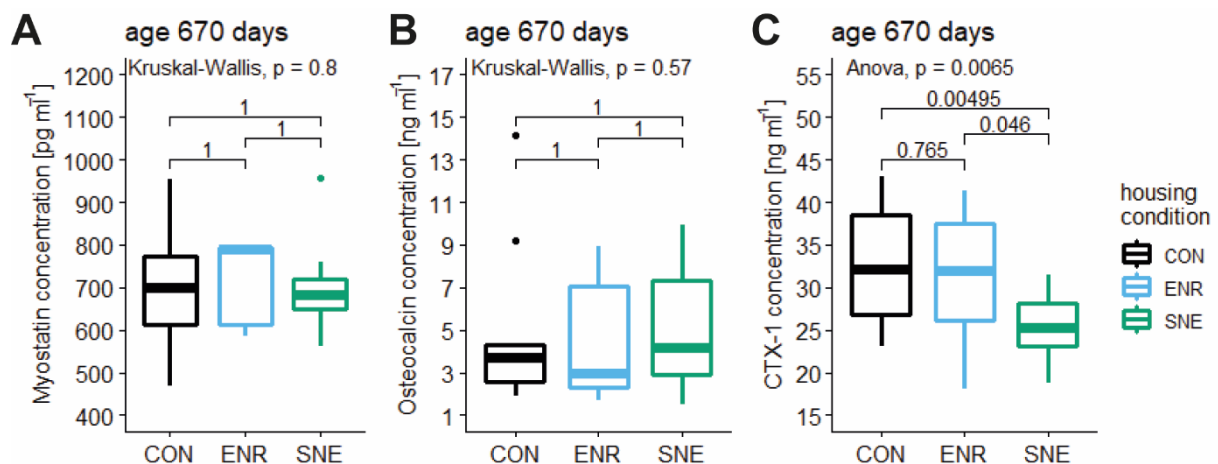

289  
290 **Figure 7. Boxplots of the blood serum concentration of three bone turnover markers myostatin (A), osteocalcin (B) and**  
291 **CTX-1 (C) of female C57BL/6J mice in three different housing conditions (CON housing in black, ENR housing in light blue**  
292 **and SNE housing in green). The parameters were measured after the perfusion at an age of 670 days and are displayed with**  
293 **the respective p values from post hoc Wilcoxon (A and B) and Tukey (C) tests.**

294

295 2.7. Resting metabolic rate

296 RMR data for animals in SNE housing were already published (21). Here the values were compared  
297 with those of the other housing conditions. The resting metabolic rates were measured at an age of  
298 585—622 days. For animals in CON housing a rate of  $42.5 \pm 7.4 \text{ ml min}^{-1} \text{ kg}^{-1}$  (17.4 %, 50.9 – 30.6 ml  
299  $\text{min}^{-1} \text{ kg}^{-1}$ ,  $n = 10$ ) was observed. In ENR housing oxygen consumption was at  $36.9 \pm 4.5 \text{ ml min}^{-1} \text{ kg}^{-1}$   
300 (12.2 %, 47.3 – 30.2  $\text{ml min}^{-1} \text{ kg}^{-1}$ ,  $n = 10$ ) and in SNE housing at  $40.5 \pm 3.4 \text{ ml min}^{-1} \text{ kg}^{-1}$  (8.4 %, 46.6 –  
301 33.3  $\text{ml min}^{-1} \text{ kg}^{-1}$ ,  $n = 19$ , **Figure 8**). The housing condition has a significant effect on the metabolic  
302 rate of experimental animals. In ENR housing the RMR is significantly lower than in CON housing.  
303 Although also being lower than in CON housing, the decreased oxygen consumption in SNE housing is  
304 not significantly different to the rates in the other housing conditions. Animals in the CON housing  
305 showed the highest variance in the RMR.

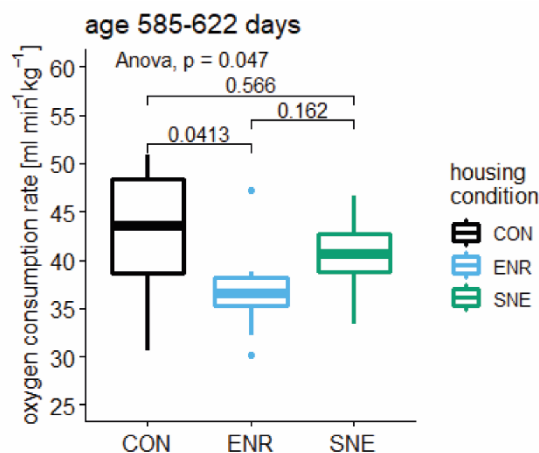

306

307 **Figure 8. Boxplot of resting metabolic rate in  $\text{mmol min}^{-1} \text{ kg}^{-1}$  for female C57BL/6J mice in three different housing**  
308 **conditions** (CON housing in black, ENR housing in light blue and SNE housing in green). The rates were measured at an age  
309 of 585—622 days and are displayed with the respective  $p$  values from a post hoc Tukey test.

310

311

312



313 2.8. Corticosterone and corticosterone metabolite concentration

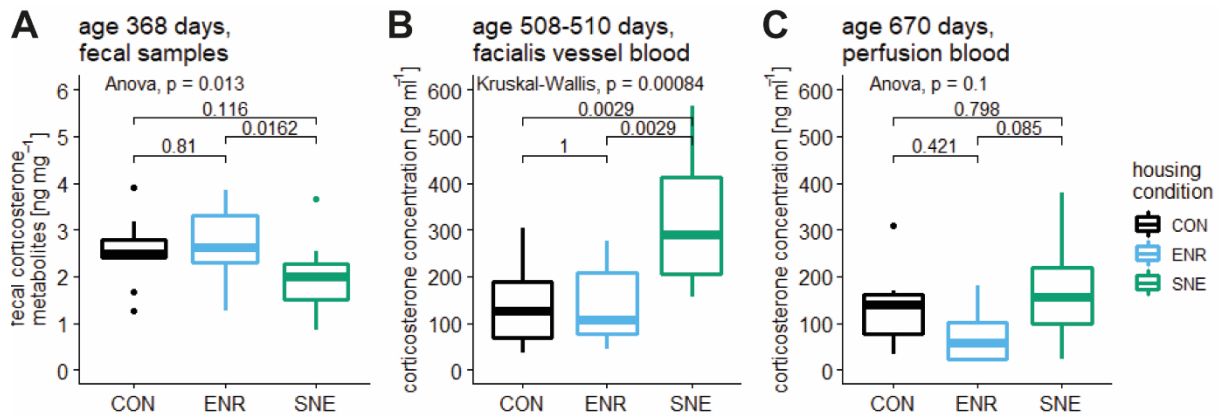

314

315 **Figure 9. Boxplots of concentrations of fecal corticosterone metabolites (FCM) and blood corticosterone for female**

316 **C57BL/6J mice in three different housing conditions. A – fecal corticosterone metabolite concentration in  $\text{ng mg}^{-1}$  in CON**

317 **(black), ENR (light blue) and SNE (green) housing at an age of 368 days with respective  $p$  value from a post hoc Tukey test. B**

318 **– facialis vessel blood corticosterone concentration in  $\text{ng ml}^{-1}$  in the housing conditions (colors equal) at an age of 508–510**

319 **days with respective  $p$  value from a post hoc Wilcoxon test. C – perfusion blood corticosterone concentration in  $\text{ng ml}^{-1}$  in**

320 **the housing conditions (colors equal) after the perfusion with respective  $p$  value from a post hoc Tukey test.**

321 Fecal corticosterone metabolite concentration of animals in CON housing was  $2.53 \pm 0.77 \text{ ng mg}^{-1}$

322 ( $30.5 \%$ ,  $3.90 - 1.26 \text{ ng mg}^{-1}$ ,  $n = 9$ ) and  $2.73 \pm 0.78 \text{ ng mg}^{-1}$  ( $28.5 \%$ ,  $3.85 - 1.26 \text{ ng mg}^{-1}$ ,  $n = 11$ ) for

323 animals in ENR housing. Concentration was lower for animals in SNE housing with  $1.94 \pm 0.65 \text{ ng mg}^{-1}$

324 ( $33.6 \%$ ,  $3.66 - 0.86 \text{ ng mg}^{-1}$ ,  $n = 19$ , **Figure 9**). There was an overall effect of housing condition with

325 SNE mice showing significant lower fecal corticosterone metabolite concentrations than ENR animals,

326 but not animals in CON housing. FCM concentration was not significantly different between CON and

327 ENR housing.

328 Blood corticosterone concentration was measured following two different methods of blood

329 sampling at two different time points. At 508–510 days of age, facialis vessel blood of animals in

330 CON housing had  $142.32 \pm 93.33 \text{ ng ml}^{-1}$  ( $65.5 \%$ ,  $303.55 - 37.42 \text{ ng ml}^{-1}$ ,  $n = 10$ ) corticosterone. ENR

331 housing showed  $132.44 \pm 81.47 \text{ ng ml}^{-1}$  ( $61.5 \%$ ,  $276.49 - 44.35 \text{ ng ml}^{-1}$ ,  $n = 9$ ). These concentration

332 values doubled for the animals in SNE housing with  $321.50 \pm 139.66 \text{ ng ml}^{-1}$  ( $43.4 \%$ ,  $564.08 - 155.03$

333  $\text{ng ml}^{-1}$ ,  $n = 15$ , **Figure 9**). Post hoc analysis showed that corticosterone concentration in SNE housing

334 was significantly higher than in animals from CON and ENR housing.  
335 After the perfusion of the animals the measurement was done with perfusion blood samples.  
336 Corticosterone concentration was  $136.95 \pm 90.79$  ng ml<sup>-1</sup> (66.3 %, 308.13 – 34.85 ng ml<sup>-1</sup>, n = 7) in  
337 CON housing,  $78.95 \pm 61.60$  ng ml<sup>-1</sup> (78.0 %, 179.75 – 19.26 ng ml<sup>-1</sup>, n = 9) in ENR housing and  $163.47$   
338  $\pm 102.92$  ng ml<sup>-1</sup> (63.0 %, 379.90 – 21.75 ng ml<sup>-1</sup>, n = 15, **Figure 9**) in SNE housing. These values gave  
339 the same trend as the measurement on facialis vessel blood, but could not reach statistically  
340 significant differences.

## 341 2.9. Data summary and data correlation

342 **Table 1 (added at the end of the manuscript): summarized results of examined parameters and correlation**  
343 **analysis.** Shown is the age of the animals at the respective time of measurement and the value of the  
344 parameter for the animals from the three housing conditions CON, ENR and SNE housing. Values are shown as  
345 the mean with the standard deviation (SD) and the coefficient of variance (CV). The housing condition showing  
346 the lowest CV is marked in the CV column in respective to the used color scheme (CON black, ENR light blue,  
347 SNE green). If a correlation analysis with another measured value was made, it is marked as the correlating  
348 parameter and the results are shown as the correlation factor r and the respective p value. If a correlation lead  
349 to a p value lower than 0.05, the correlation is marked gray.

350

## 351 3. Discussion

352 Housing female C57BL/6J mice under conventional, enriched, and semi naturalistic conditions for a  
353 period of 588 days affected the examined parameters in this study in several ways. Physiological  
354 parameters body weight and body length both reached higher values with higher complexity of the  
355 housing condition. This correlated with the effect of housing condition on the examined  
356 retroperitoneal and periovarian adipose tissues. The adipose tissue weight was also higher in animals  
357 of ENR housing in comparison to CON housing and increased significantly in SNE housing. In contrast,  
358 no effect was observed in muscle weight. Comparable to the lack of differences in muscle weight,  
359 mice from different housing conditions also showed no differences in grip strength and only a weak

360 effect on the metabolic rate was detected. Animals of the ENR housing showed the lowest oxygen  
361 demand.

362 The bone characteristics of the mice seem to have been influenced in part by the different housing  
363 condition. However, no uniform effect emerged. There was a clear trend of SNE housing inducing a  
364 higher bone density with a significant effect on one year old animals. This trend was also observed  
365 for the cortical thickness of the femur bones, the femur length and the femur diameter during post  
366 mortem analysis one year later. A more detailed look into bone formation and degradation  
367 parameters showed only the effect of CTX-1 being lower in blood samples of SNE animals than in  
368 CON and ENR animals indicating reduced osteoclast-mediated bone resorption. Surprisingly, all  
369 animals showed anomalies in the bone structures. However, these anomalies seemed to be reduced  
370 by the SNE housing. Finally, the stress hormones of the animals were examined according to different  
371 methods. Here, too, opposite effects were observed. In the fecal samples of the animals, the lowest  
372 corticosterone concentrations were shown in semi naturalistic environment compared to the other  
373 two housing systems. In blood samples, however, SNE animals showed the highest concentrations.

374 The individual results are discussed in more detail below.

375 The conditions and experiments listed here suggest that laboratory mice achieve greater body  
376 lengths and weights with increasing complexity of housing. For body weight, this was also observed  
377 by Augustsson *et al.* in an experimental design with increasing EE (19). The difference in body weight  
378 was due to either different feed intake or different levels of exercise. Since environmental  
379 enrichment usually prevents altered feed intake (31–33) and the same type of feed was available *ad*  
380 *libitum* in all housing conditions, it could not be due to the feed itself but to the amount consumed  
381 and maybe to the way the feed was consumed. In cage housing, the feed was available at the feeding  
382 racks of the cage lid. In SNE, the feed was in small bowls on the bottom of the cage surface. In  
383 conventional and enriched cage housing, the animals thus reared up to get to the feed. In SNE, they  
384 eat from the floor as in nature and thereby not having to rear up. This different way of feeding might  
385 conserve energy and potentially shift energy turnover and thereby promote adipose tissue storage in

386 the animals. However, longer distances to food sources most likely negate such an effect. The  
387 retroperitoneal adipose tissue weight did correlate with the body weight in all three housing  
388 conditions. The correlation between periovarian adipose tissue weight and body weight of the  
389 animals was not found for the CON housing condition. All in all, this indicates that feeding in enriched  
390 environments might lead to greater adipose tissue deposits and thereby higher body weight.  
391 However, this conclusion only applies under the assumption that environmental enrichment does not  
392 affect the time spend feeding (34). In order to better understand how the increased weight in SNE  
393 and ENR conditions came about a more detailed analysis of feeding behavior is warranted. It is worth  
394 noting that none of the animals showed severe signs of obesity under any of the housing conditions.

395 Another reason for the physical change were more and different possibilities of movement. The  
396 ability to run longer and farther or climb more in an enriched or semi naturalistic environment  
397 suggest that more muscle is developed and therefore higher body weights are achieved (35).  
398 However, no significant difference in muscle weight was observed in relation to different body  
399 weights. One reason for this could be the advanced age of the animals at the time of the  
400 investigation. The older the animals become, the lower the muscle mass and strength of the animals  
401 (36). Regular exercise and stressing of the muscles slow down this process, but it cannot be  
402 prevented.

403 The lack of difference in muscle weight is consistent with the findings in the myostatin concentration  
404 of the animals. There were no significant differences in the myostatin concentration between the  
405 animals in the different housing conditions. There was also no correlation between the measured  
406 concentration of myostatin and the muscle weight of the animals in all three housing conditions.  
407 Since the muscle mass of mice is directly linked to the levels of myostatin (37,38), an effect of  
408 housing should be recognizable on the basis of myostatin concentration. Also corresponding to the  
409 consistent muscle weight in the three housing conditions, no significant difference was detected in  
410 the grip strength of the animals. There was a comparable trend between the two measurements, in  
411 which animals of the ENR housing had the highest values of grip strength while CON and SNE had

412 similar values. In addition, no effect of the age of the animals in relation to grip strength was  
413 observed. Muscle strength is expected to diminish with age (36,39). However, at 558 days of age,  
414 when the grip strength was first measured the animals must already be considered old. Therefore,  
415 any effect of progressively increasing age on muscle strength could probably not have been detected.

416 The increasing body weight of experimental animals in this study could also have been influenced by  
417 the bone skeleton properties. This is supported by the, in some cases, significantly larger dimensions  
418 of the femora of the animals in the enriched environments. Increasing length and diameter of the  
419 femora in ENR and SNE housing were also accompanied by increasing cortical thickness. The cortical  
420 thickness and body weight did correlate in CON animals – the heavier the animals were, the thicker  
421 the femur cortical bone. It is possible, that increased opportunity for exercise in ENR and SNE  
422 housing has stimulated longitudinal growth, especially while the animals were still younger (40).

423 Besides the mere dimensions of femora, at two different time points during the housing of the  
424 animals under different housing conditions, there was a correlation between the bone density and  
425 body weight of the animals. The higher the bone density the higher the animal's weight. There was  
426 also an indirect correlation of cortical porosity with body weight in all three housing conditions. In  
427 CON housing even significantly before alpha correction – the heavier an animal, the less porous the  
428 femur cortical bone. However, it is likely that the underlying causality is not that mouse body weight  
429 is determined by bone density, but that higher body weight leads to higher bone density. In fact it is  
430 well established that increased body mass leads to increased bone density (41). Moreover, the  
431 correlation between body weight and bone density could not be found for CON and ENR animals.

432 The causes of differences in bone characteristics are multifactorial and might be influenced by  
433 movement behavior, food intake, body weight and regular forces (e.g., high jumps) experienced by  
434 the skeletal system. The increased bone density in more complex environments can on the one hand  
435 probably be explained by the larger bones in the two dimensions recorded. The SNE animals tended  
436 to have longer femora and significantly larger femora in diameter. A consistent cortical thickness was  
437 observed between the housing conditions. An equally thick bone wall with larger bones means a

438 higher bone mass, which yields higher values in the applied bone density method. In ENR femur  
439 length did correlate with cortical thickness and did negatively correlate with cortical porosity. The  
440 longer the femur, the thicker and less porous the cortical bone. This correlation could not be shown  
441 for CON and SNE animals but might explain the effect at 340 days of age and the trends at the two  
442 later measurement times.

443 When looking at the parameters regarding the composition and structure of the bone skeleton, only  
444 few correlations were discovered. For ENR animals a strong correlation between bone density and  
445 grip strength was found. Animals with higher muscle loading, as it for example occurs during climbing  
446 in enriched environments, could have higher grip strength. It is known that sustained muscular  
447 loading also increases the dimensions and strength of bones (42,43). However, contrary to our data it  
448 would be expected that in the SNE, where there was climbing at the grid and where the animals  
449 covered a lot of distance, this effect would have been confirmed.

450 The concentration of CTX-1 as a factor of bone resorption was significantly influenced by housing  
451 conditions. Animals living in the SNE showed less CTX-1 than the animals of CON and ENR housing. In  
452 studies on humans, exercise has been found to reduce CTX-1 even in older participants (44,45).  
453 Therefore, it can be assumed for mice as well that the larger range of motion in the SNE reduces  
454 bone resorption. This also seems to be reflected in the frequency of bone anomalies. Although the  
455 proportion of animals exhibiting anomalies was generally high, the enriched housing had fewer  
456 animals with anomalies. These also had fewer anomalies per animal, at least in the SNE, than in the  
457 CON housing. This observation is potentially linked to the increased opportunity and necessity for  
458 movement under SNE housing conditions. It is well established that regular exercise improves  
459 skeletal metabolism by inhibiting osteoclast activity among other effects (46–48). Our results  
460 regarding CTX-1 appear to be in line with this pattern. Overall, however, only minor effects on total  
461 bone density and structural parameters were observed. It is therefore likely that other confounding  
462 factors, especially the age of the animals, mask a stronger skeletal manifestation of the observed  
463 biochemical changes.

464 Besides the body weight, the body length also increased in ENR and SNE housing compared to CON  
465 housing. This was examined when measuring the anesthetized animals before their perfusion at 670  
466 days of age. A correlation was also found for body length and body weight. Except for ENR housing,  
467 all animals showed, that the longer their bodies, the higher was their body weight. This might  
468 indicate a leaner “athletic” body type under ENR conditions. The enrichment elements used in the  
469 ENR housing promotes vertical movement and the running disc should create an incentive for activity  
470 compared to the CON housing. There is indication that stereotypies, which can occur in caged mice,  
471 are compensated by increased use of running wheels (49). Therefore, increased exercise on the  
472 running disc may have favored a leaner body type. On the other hand, it remains unclear why the  
473 unequally larger exploration area in the SNE did not cause the same effect.

474 In general, there is a close biological relationship between resting metabolic rate and body weight. As  
475 body weight increases, greater metabolic rates are achieved within the same species. The alteration  
476 of the resting metabolic rate depends on the energy needs of all organs and body components (50).  
477 It is reasonable to assume that the possibility of more outlet and activity increases the proportional  
478 demand of muscle mass. However, in our study, muscle weight was not affected by housing  
479 conditions and the metabolic rate of mice from the SNE was not increased despite of larger cage  
480 space and possibility of movement. There was also no correlation found between body weight of the  
481 animals and their respective resting metabolic rate nor specifically between muscle weight and  
482 resting metabolic rate. To further specify the cause of the results of the present study, the activity of  
483 the animals would have to be recorded. A measure of activity in the homecage was, however, not  
484 included in our ENR and CON housing. Due to the diversity of the housing conditions, a comparable  
485 method for activity determination will not be easy.

486 Besides the activity of the animals, thermoregulation could be another reason for the differences in  
487 resting metabolic rate. The SNE housed twenty animals. This usually leads to a grouping of all or large  
488 groups of the mice in common nests during the resting periods. More animals within the same nest  
489 allow for less thermoregulation during resting and therefore a lower metabolic rate (51,52). ENR

490 housing promotes the same effect by providing additional nesting material and clearly more  
491 delineated and narrower nesting areas. On the other hand, animals in SNE housing showed no  
492 significant difference in metabolic rate compared to control animals. Lower metabolic rate due to a  
493 long-term effect of lower thermoregulation could be explained by increased stress level during  
494 calorimetry. The differences in housing conditions between SNE and single housing in a type II  
495 Makrolon measuring cage may be associated with higher stress for the SNE mice. The animals are not  
496 accustomed to a confined cage and may show increased resting metabolic rate due to increased fear.

497 To determine the effects of housing conditions on the stress level of the experimental animals,  
498 adrenocortical activity was measured using different samples with opposing results. Fecal samples  
499 showed a significantly lower concentration for SNE housing and equally high concentrations in CON  
500 and ENR housing. In contrast, facialis vessel blood samples showed significantly higher  
501 concentrations for SNE housing. Again, CON and ENR housing did not cause statistically relevant  
502 differences in corticosterone concentration. Results from perfusion blood samples showed no  
503 significant effect but a similar trend. SNE housing caused the highest concentration. In this  
504 measurement values for CON housing were closer to values for SNE housing than to values for ENR  
505 housing.

506 The fact that different results are obtained with different samples matrices is not unusual. Whereas  
507 measuring fecal corticosterone metabolites is noninvasive and of sufficient accuracy (53,54),  
508 concentrations in fecal samples reflect a more pooled and temporally deferred sample of stress  
509 hormonal activity. FCMs are pooled due to the mixing of feces in the intestine during metabolism.  
510 The temporal delay results from the length of time the feces remain in the animals' bodies between  
511 the measured state and the actual sampling (55,56). In contrast, measuring corticosterone  
512 concentrations in blood always requires taking a blood sample within a few minutes. In fact, the  
513 sampling method itself introduces a potentially more stressful situation for the animals than  
514 everyday housing can cause (57–59). Although it was aimed to minimize the length of sampling, the  
515 time from picking a mouse out of the SNE until obtaining the blood sampling might have been too



516 long to still reflect baseline corticosterone level. All in all the lack of statistical different  
517 concentrations in perfusion blood suggest that the stress level at the time of perfusion was the same  
518 for animals from all housing conditions. The results from the fecal samples on the other hand  
519 indicate that an enriched semi-natural environment reduces baseline stress levels and is in line with  
520 previous results (60). However, it should be emphasized that the different samples were also  
521 collected at different times during the housing of the mice. Thus, an effect of age as a cause for the  
522 contrasting results cannot be excluded without doubt. Given this relationship, EE seems to have  
523 more of a stress-reducing effect in this study.

524 Comparable to a previous analysis (21) and literature data (5), no indication for increased variability  
525 was found. To the contrary, in this study a total of 20 parameters were evaluated in 30 different  
526 measurements. In 22 measurements, lower variances of the measured values were measured for one  
527 of the two enriched housing conditions (ENR or SNE) compared to the conventional housing. In 14  
528 cases this was true in both enriched housing conditions. This indicates that the general fear of  
529 increased variability due to improved housing conditions does not hold true.

### 530 **Limitations**

531 Although a significant difference between the SNE housing and the other housing conditions was  
532 found in the weights of both adipose tissues examined (retroperitoneal and periovarian), these  
533 results should be viewed with caution. The variance of adipose tissue weight is strongly dependent  
534 on the execution of the section. Dissecting the adipose tissue requires skill and a clear differentiation  
535 between the target tissue and surrounding tissue. Although the preparation was always performed  
536 by the same person, methodological error cannot be ruled out.

537 The method to measure grip strength applied here might not have been ideal, since the steady  
538 pulling of the animals on the holding device is motorically demanding and requires training and  
539 experience of the animal as well as of the experimenter. In addition, it has to be taken into account,  
540 that during the process of pulling the animals, the motivation to hold on rather than the actual

541 strength of the animals is measured.

542 One argument against the generalizability of the data collected could be the duration of the housing  
543 itself. There are a few indications in the literature that effects of EE can be reduced or weakened by  
544 long housing periods (61). Many of the parameters in our study were measured at a high age of two  
545 years. Effects of EE on the development of the animals could therefore hardly be shown. Indeed, it is  
546 likely that ageing related degenerative effects partially mask the environmental effects at this age.  
547 This is quite well indicated by the clear and significant difference of bone density at the age of one  
548 year (generally healthy, middle-aged animals) that vanished throughout the subsequent year. Also,  
549 the high prevalence of skeletal anomalies indicates that skeletal degeneration has progressed quite  
550 far in these older mice.

551 On a sidenote, it can be concluded from this data that the investigated housing conditions do not  
552 prevent ageing-related bone loss.

553 The correlation analyses used to discuss the physiological parameters among themselves were also  
554 subject to a prior test for normal distribution. Nevertheless, these analyses involve different group  
555 sizes. In particular, the number of individuals in the SNE housing can add weight to the results. The  
556 correlations were therefore considered with caution.

## 557 **Conclusion**

558 Overall, female C57BL/6J mice in all housing conditions exhibited strain-typical values for body  
559 weight development throughout the lifespan (62,63). Within this range, housing them in conditions  
560 that are more natural, increased weight and length of the animals. It is worth noting, that none of  
561 the studied parameters was negatively affected by more enriched housing. All in all, bone properties  
562 appear to be slightly improved by more natural housing and age-related increased bone resorption  
563 was reduced. We confirmed previous studies, showing that the variance of the data was not  
564 increased by more natural housing conditions. This indicates that more natural housing conditions  
565 are a feasible way for housing and testing laboratory mice.

## 566 **4. Materials and method**

### 567 4.1. Animals

568 For this study 44 female C57BL/6J mice were purchased from Charles River (Charles River, Sulzfeld,  
569 Germany). Social housing of male mice in large enclosures may promote increased aggression due to  
570 territorial behavior in male animals (27). To minimize possible adverse effects of aggressive behavior,  
571 only female animals were used in this study. At arrival, animals were eight to nine weeks old. The  
572 mice were special pathogen free, were checked for their health status, weighed and then randomly  
573 assigned to one of seven groups in three different housing conditions (3 × 4 animals in conventional  
574 housing CON, 3 × 4 animals in enriched housing ENR and one group of 20 animals in a semi  
575 naturalistic environment SNE). Prior to the experiment, the groups were kept in standard Type III  
576 Makrolon cages in an open rack system. After seven days of habituation and daily handling training,  
577 animals were tagged individually with a radio frequency identification (RFID) transponder. After  
578 another two weeks of monitored recovery and handling training, animals were transferred to their  
579 respective housing conditions in a special laboratory area for animal keeping. During habituation and  
580 experimental housing animals were kept at a 12/12 h light cycle (summertime lights on 8:00 a.m.–  
581 lights off 8:00 p.m., wintertime lights on 7:00 a.m.– lights off 7:00 p.m.), at 22.0 ± 2.0 °C, and 50.0 ±  
582 5.0 % humidity. The animals were kept in the experimental housing conditions from 82 days of age to  
583 670 days (approx. 2 years). At different points during this time, physiological parameters were  
584 measured. Once a week, animals were weighed and handled to check for their health status. At the  
585 end of the experimental phase, the animals were put under anesthesia with a mixture of ketamine  
586 and xylazine and were transcardially perfused. Body length was measured, blood was collected, and  
587 adipose tissue, muscles, and bones were removed and weighed. Adipose tissue and muscle weights  
588 were analyzed and plotted both as actual weights and relative to animal body weight. During the  
589 study, four of the 44 animals died prior to the planned perfusion of the experimental animals due to  
590 causes unrelated to this study. The reduced animal numbers are marked in the respective parts of  
591 the results. All experiments were conducted in accordance with the applicable European and

592 national regulations and were approved by the State Office for Health and Social Affairs Berlin (G  
593 0069/18).

#### 594 4.2. Transponder injection

595 All animals were marked individually for identification with a RFID transponder of two types (Type 1 –  
596 FDX-B transponder according to ISO 11784/85; Planet-ID, Essen, Germany/Euro I.D., Köln, Germany  
597 or Type 2 – ID 100, diameter: 2.12 mm; length: 11.5 mm, Trovan, Ltd., Douglas, UK). For analgesia the  
598 animals received the non-opioid analgesic meloxicam (0.1 mg kg<sup>-1</sup>, Meloxydyl, Ceva Tiergesundheit  
599 GmbH, Düsseldorf, Germany) orally 60 min before the injection. The transponder was injected  
600 subcutaneously between the shoulder blades (scapulae) under inhalation anesthesia with isoflurane  
601 according to established procedures (1.0–1.5 % in 30 % O<sub>2</sub> with 70 % N<sub>2</sub>O). The wound was then  
602 manually closed and fixed for a few seconds to initiate natural wound closure or closed with tissue  
603 adhesive when necessary. The awakening of the animals was monitored in a separate cage.

#### 604 4.3. Housing conditions

##### 605 Conventional housing CON

606 This housing condition served as the control condition during the experiments. It meets the minimal  
607 standards for animal housing, regulated by guidelines at national and international level (i.e.,  
608 directive 2010/63/EU). Similar to the standard caging during habituation CON housing consisted of a  
609 Type III Makrolon cage with a floor area of 840 cm<sup>2</sup> and 153 mm height. It was filled with approx. 3  
610 cm aspen bedding (Polar Granulate 3–5 mm, Altromin, Lage, Germany). The cage contained a red  
611 triangle plastic house, a wooden gnaw stick, a small cotton roll of nesting material and two pieces of  
612 paper towel. Mice had *ad libitum* access to tap water and food (autoclaved pellet diet, LAS QCDiet,  
613 Rod 16, LASvendi, Soest, Germany).

##### 614 Enriched housing ENR

615 The enriched cage housing was set up identically to the conventional housing but was extended with  
616 different kinds of enrichment. These enrichment elements were assigned to categories regarding

617 their prospective function and placed in the cages additionally or as an alternative to the  
618 conventional housing features. The equipment of a single cage consisted of a mouse house with a  
619 running disc, an alternative house, a wooden platform clamped between the walls of the cage, one  
620 structural element hanging from the cage lid, an interactive enrichment element and alternative  
621 nesting material in addition to the cotton roll and pieces of paper. This combination of the  
622 enrichment elements was changed every week. The only permanent element within the cage was the  
623 running disc. Elements of the other categories were combined randomly. In addition to regular food,  
624 the interactive enrichment element daily offered approx. 3.5 g millet seeds as a treatment to  
625 facilitate interaction with the interactive enrichment. The same amount of millet seeds was offered  
626 to animals in the other housing conditions (CON and SNE) by spreading it in the bedding. For a  
627 detailed description of the enrichment elements and their combination, see Hobbiesiefken et al.  
628 (2021) (3).

#### 629 Semi naturalistic environment SNE

630 The SNE was set up and operated as described in Mieske et al. (2021) (21). Briefly, the SNE consists of  
631 a large mesh wired enclosure with an area of 4.6 m<sup>2</sup> spread over five different levels in different  
632 heights. On each level of the SNE there was access to water, food and shelter in form of a red triangle  
633 plastic house. The two upper levels also provided upside down Type I Makrolon cages as nesting  
634 boxes. Plexiglas tubes connected the different levels. Similar to the CON and ENR housing conditions,  
635 the SNE was also filled with 3–5 cm of aspen bedding. Every level provided two wooden gnawing  
636 sticks, two cotton rolls and two pieces of cellulose paper as nesting material. The two nesting boxes  
637 also provided two cotton rolls and two pieces of paper. For additional enrichment, the animals had  
638 access to Plexiglas tubes as structural enrichment elements and a small selection of self-designed  
639 toys of different shape and color.

#### 640 4.4. Bone density and structural properties

641 X-ray images for determination of bone density were obtained on a Bruker InVivo Xtreme II (Bruker,  
642 Billerica, MA USA). The animals were picked in a randomized order, were anesthetized with

643 isoflurane (1.0–1.5 % in 30 % O<sub>2</sub> with 70 % N<sub>2</sub>O) and placed on the platform for X-ray acquisition.

644 Anesthesia was maintained during the whole procedure. Eyes of the animals were protected with  
645 dexpanthenol creme. The awakening of the animals was monitored before the animals were placed  
646 back into the home cage. On the x-ray images a region of interest (ROI) was selected on the right  
647 femur of the animals. Bone density in g cm<sup>-3</sup> was then determined by the Bruker Molecular Imaging  
648 Software. Bone density was measured three times during the housing of the animals at 340 days of  
649 age, 501 days and 664 days.

650 After perfusion of the animals, the leg bones of the animals were dissected. The samples were fixed  
651 for 24 h in paraformaldehyde (4 % PFA), washed three times with phosphate-buffered saline (PBS)  
652 and afterwards stored in 30 % sucrose solution. Length and diameter of the right femur and  
653 characteristics of the cortical and trabecular bone were analyzed using x-ray micro-computed  
654 tomography ( $\mu$ CT). The  $\mu$ CT scanning and analysis were performed as described by Zhao et al., 2021  
655 (64). Briefly, the right femur of each mouse was fixed and placed into a radiotranslucent sample  
656 holder. Samples were scanned and analyzed with a voxel resolution of 10  $\mu$ m using a  $\mu$ CT 40 desktop  
657 cone-beam microCT (Scanco Medical, Switzerland) according to standard guidelines (65). Trabecular  
658 bone was analyzed in the distal metaphysis in a volume situated 2500–500  $\mu$ m proximal to the distal  
659 growth plate. Cortical bone was analyzed in a 1000  $\mu$ m long volume situated in the middle of the  
660 diaphysis. Cortical bone evaluation was performed with a threshold of 300, whereas for trabecular  
661 bone, a threshold of 250 was used. The length of the femora was determined by the number of slices  
662 containing the bone.

663 For histology, tibiae were embedded in Poly(methyl methacrylate)(PMMA) and sectioned at 4  $\mu$ m  
664 thickness in the sagittal plane. Sections were stained by the von Kossa/van Gieson or Toluidine blue  
665 staining procedure (66). Structural anomalies in the tibia bones were characterized by microscopic  
666 inspection and their occurrence was counted. For biomechanical testing, a three-point bending test  
667 was performed on dissected femora using a Z2.5/TN1S universal testing machine and testXpert  
668 software (both Zwick Roell, Germany) as described previously (67).

669 4.5. Grip strength

670 Animals were tested separately and in a randomized order. Grip strength was measured with a  
671 computerized grip strength meter (TSE Systems GmbH, Bad Homburg, Germany). The apparatus  
672 consisted of a T-shaped metal bar connected to a force transducer. To measure the grip strength in  
673 the hind paws of the mice, the mice were carefully held at the base of the tail and guided towards  
674 the metal bar with their hind paws. Their front paws were placed on a wire mesh cylinder to prevent  
675 the mice from grasping the bar with their front paws. The animal was then gently pulled backwards  
676 until the grip was lost. The peak force applied to by the hind legs was recorded in ponds (p) and  
677 converted to Newton (N). This measurement was done three times per animals on one day and the  
678 mean peak value was recorded. After the procedure, animal were placed back into their home cage.  
679 The grip strength was measured two times during the housing of the animals at the ages of 508-510  
680 days and 664 days.

681 4.6. Bone and muscle turnover markers

682 The blood serum concentration of the three following bone and muscle turnover parameters were  
683 analyzed with enzyme-linked immunosorbent assays (ELISA). All used ELISA kits were performed  
684 according to the manufacturer's instructions.

685 *C-terminal telopeptides (CTX-1)* – Serum CTX-1 concentration was detected with the RatLaps™ (CTX-  
686 1) ELISA kit (competitive ELISA) (Immunodiagnostic Systems Holdings Ltd., Boldon, UK).

687 *Osteocalcin* – Osteocalcin concentration in the blood serum was detected with the Mouse  
688 Osteocalcin (OC) ELISA kit (competetive ELISA) (MBS275134, MyBioSource, Inc., San Diego, CA USA).  
689 The serum was diluted 1:10 before analysis.

690 *Myostatin* – Serum myostatin concentration was analyzed with the Mouse Myostatin ELISA kit  
691 (quantitative sandwich ELISA) (MBS166373, MyBioSource, Inc., San Diego, CA USA).

692 4.7. Resting metabolic rate

693 The principle of indirect calorimetry (TSE phenomaster, TSE Systems GmbH, Bad Homburg, Germany)

694 was used to evaluate the metabolic rate. The calorimetry system measures differences in the  
695 composition of air passed individually through four measurement cages and an empty reference  
696 cage. The system was situated at a separate room at a 12/12 h light cycle,  $22.0 \pm 2.0$  °C, and and 50.0  
697  $\pm 5.0$  % humidity. Animals were tested at 584–594 days of age in a randomized order. Following  
698 habituation to the experimental room (12h), mice were weighed and placed individually in  
699 measurement cages equipped with bedding, shelter and nesting material. Food and water were  
700 accessible *ad libitum* during the entire measurement and were weighed before and after the  
701 experiment. Measurement cages and the reference cage were perfused with air. In the measurement  
702 cage oxygen was lowered and carbon dioxide was increased by the respiration of the animals during  
703 the measuring period (12 h light period). After flowing through both cages, the composition of air  
704 was compared between measurement cage and reference cage. By calculating the difference  
705 between air compositions, the metabolic rate of the examined animal was assessed. After the  
706 measurement the mice, food, and water were weighed and the animals were placed back into their  
707 home cage. The resting metabolic rate (RMR) was measured as oxygen consumption rate  $\dot{V}_{O_2}$  during  
708 the resting phases of the animals. To separate resting phases from active phases, the cumulative  
709 frequency percentage was plotted against the measured  $\dot{V}_{O_2}$ . With a segmented linear regression,  
710 the threshold between  $\dot{V}_{O_2}$  of the resting phase and the active phase could be calculated. Data below  
711 the threshold was used to determine the RMR ((68); R package 'segmented').

#### 712 4.8. Corticosterone and corticosterone metabolite concentration

713 The concentration of corticosterone or corticosterone metabolites was measured two times during  
714 the housing of experimental animals and one time after the perfusion of the animals. The first  
715 measurement was done at an age of 368 days. At 8:00 to 10:00 am animals were individually placed  
716 in a random order in Type II Makrolon cages. The cages were just equipped with flatly spread paper  
717 towels. After a minimum period of 20 min and maximum of 30 min animals were placed back into  
718 their home cage. The fecal boli that the animals had deposited in isolation were collected and used  
719 for analyzing corticosterone metabolites (fecal corticosterone metabolites - FCM) as described



720 before (53,55).

721 At an age of 508–510 days on three consecutive days animals were individually fixated and blood was  
722 taken from the *Vena facialis* blood vessel after puncture with a lancet needle. For the CON and ENR  
723 animals, blood sampling was performed immediately after the animals were removed from the cage  
724 (within 1 minute). The SNE animals were first removed from the large enclosure and held collectively  
725 in a type 4 cage for a short time (30–45 min). The blood samples were collected in 0.2 ml reaction  
726 tubes and stored at -80 °C for further analysis. Serum corticosterone concentration was determined  
727 with a DRG Corticosterone ELISA (EIA-4164, DRG International Inc., Springfield, NJ USA).

728 The third measurement was done with the blood samples collected after the perfusion of the  
729 animals at 670 days of age. Concentration of corticosterone was determined as described before.

#### 730 4.9. Statistical analysis

731 Unless described otherwise, all measured data is presented as mean  $\pm$  standard deviation. In  
732 addition, the coefficient of variation (CV), the maximum value, the minimum value and the number  
733 of measured animals is given ( $\bar{x} \pm SD$  (CV, max – min, n)).

734 Analysis and illustration of data was done with the software environment R (v 3.6.3, R Foundation for  
735 Statistical Computing, Vienna, Austria, R Studio v 1.2.1335, RStudio, Inc., Boston, MA, USA). When  
736 preparing the data for statistical analysis, they were first examined for normal distribution  
737 ('shapiro.test()' function) within the different groups (housing conditions). Possible outliers were  
738 identified using the 'boxplot.stats()' function and excluded for the presentation and statistical  
739 analysis of the respective data set. If normal distribution was given, an ANOVA with a Tukey post hoc  
740 analysis was used to compare the data between the housing conditions ('aov()' and 'tukey\_hsd()'  
741 function). If data were not distributed normally, the Kruskal-Wallis test with a Wilcoxon post hoc  
742 analysis was applied ('kruskal.test()' and 'compare\_means(method = "wilcox.test")' function in  
743 'ggpubr' package). Unless described otherwise, boxplot figures show the adjusted *p*-value after  
744 Bonferroni correction.

745 Continuous data were analyzed using linear models ('lm()' function). Related predictors were added

746 as mixed effects to the regression models (package 'lme4' (69), 'lmer()' function). Subsequent  
747 statistical comparison of different models ('anova()' function) identified the factors affecting the  
748 continuous data.

749 Possible statistical differences in discrete data were analyzed using the  $\chi^2$  test (chi square test). This  
750 was performed by using the 'chisq.test()' function.

#### 751 **Declarations**

#### 752 **Ethics approval and consent to participate**

753 All experiments were approved by the Berlin state authority, Landesamt für Gesundheit und Soziales,  
754 under license No. G 0069/18 and were in accordance with the German Animal Protection Law  
755 (TierSchG, TierSchVersV).

#### 756 **Consent for publication**

757 Not applicable

#### 758 **Availability of data and materials**

759 The datasets generated and/or analysed during the current study are available in the  
760 RefinementReferenceCenter/musculoskel2022\_mieskep\_available\_data repository,  
761 [https://github.com/RefinementReferenceCenter/musculoskel2022\\_mieskep\\_available\\_data](https://github.com/RefinementReferenceCenter/musculoskel2022_mieskep_available_data)

#### 762 **Competing interests**

763 The authors declare that they have no competing interests

#### 764 **Funding**

765 Not applicable

#### 766 **Authors' contributions**

767 Conceptualization, P.M., U.H., K.D. and L.L.; methodology, P.M., U.H., K.D. and L.L.; formal analysis,  
768 P.M., J.S., J.P., L.B., T.Y., R.P.; data curation, P.M.; writing—original draft preparation, P.M.; writing—  
769 review and editing, P.M., U.H., J.S., J.P., L.B., T.Y., R.P., K.D. and L.L.; visualization, P.M.; supervision,

770 K.D. and L.L.; project administration, K.D. and L.L. All authors have read and agreed to the published  
771 version of the manuscript.

## 772 Acknowledgements

773 Large parts of the SNE and the RFID tracking software were developed during L.L.'s postdoctoral  
774 period in the laboratory of N. Sachser, who generously provided all the material. The authors thank  
775 the animal caretakers, especially Carola Schwarck and Lisa Gordijenko, for their support in the animal  
776 husbandry. Special thanks and appreciation to Prof. Dr. Dieter Felsenberg for his contribution to the  
777 overall concept of the study. We thank Olga Winter, Andrea Thieke, Annette Jung and Edith Klobetz-  
778 Rassam for excellent technical assistance.

## 779 Supplements

780 Additional data to – 3.3 Bone density and structural properties data is provided in Figure S1 and  
781 Table S1

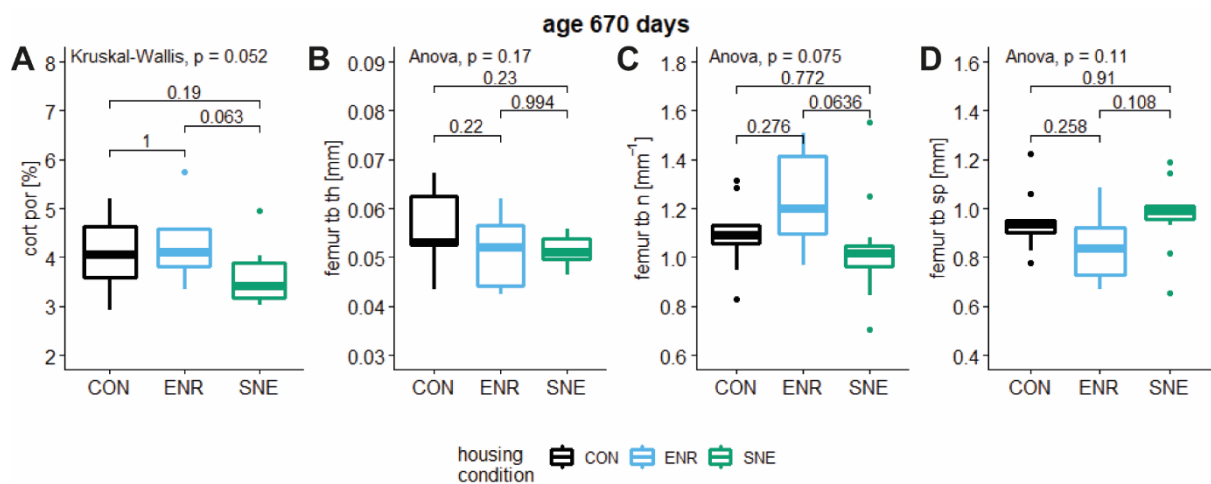

782

783 **Figure S1. Structural femur properties of female C57BL/6J mice in three different housing conditions.** A –  
784 cortical porosity in % with respective  $p$  values from post hoc Wilcoxon test. B – femur trabecular thickness in  
785 mm with respective  $p$  values from post hoc Tukey test. C – number of femur trabecular bones in  $\text{mm}^{-1}$  with  
786 respective  $p$  values from post hoc Tukey test. D – separation between femur trabecular bones in mm with  
787 respective  $p$  values from post hoc Tukey test.

788

789 **Table S1. Summarized results of examined parameters** in addition to 3.3 Bone density and structural  
 790 properties data and **Table 1**. Shown is the age of the animals at the respective time of measurement and the  
 791 value of the parameter for the animals from the three housing conditions CON, ENR and SNE housing. Values  
 792 are shown as the mean with the standard deviation (SD) and the coefficient of variance (CV). The housing  
 793 condition showing the lowest CV is marked in the CV column in respective to the used color scheme (CON  
 794 black, ENR light blue, SNE green).

| animal age | parameter                                             | housing condition | mean ± SD (max-min, n)                                               | CV   |
|------------|-------------------------------------------------------|-------------------|----------------------------------------------------------------------|------|
| days       |                                                       |                   |                                                                      | %    |
| 670        | cortical porosity<br>( <i>Figure S1 A</i> )           | CON               | 4.1 ± 0.7 % (5.2 – 2.9 %, n = 9)                                     | 17.6 |
|            |                                                       | ENR               | 4.2 ± 0.7 % (5.8 – 3.3 %, n = 9)                                     | 16.7 |
|            |                                                       | SNE               | 3.6 ± 0.6 % (5.0 – 3.0 %, n = 12)                                    | 15.5 |
|            | femur trabecular thickness<br>( <i>Figure S1 B</i> )  | CON               | 0.056 ± 0.007 mm (0.067 – 0.044 mm, n = 9)                           | 13.2 |
|            |                                                       | ENR               | 0.051 ± 0.007 mm (0.062 – 0.042 mm, n = 9)                           | 14.3 |
|            |                                                       | SNE               | 0.051 ± 0.003 mm (0.056 – 0.046 mm, n = 11)                          | 6.4  |
|            | femur trabecular number<br>( <i>Figure S1 C</i> )     | CON               | 1.09 ± 0.15 mm <sup>-1</sup> (1.31 – 0.83 mm <sup>-1</sup> , n = 9)  | 13.8 |
|            |                                                       | ENR               | 1.23 ± 0.20 mm <sup>-1</sup> (1.51 – 0.97 mm <sup>-1</sup> , n = 9)  | 16.0 |
|            |                                                       | SNE               | 1.03 ± 0.21 mm <sup>-1</sup> (1.55 – 0.71 mm <sup>-1</sup> , n = 12) | 20.3 |
|            | femur trabecular separation<br>( <i>Figure S1 D</i> ) | CON               | 0.948 ± 0.131 mm (1.224 – 0.777 mm, n = 9)                           | 13.8 |
|            |                                                       | ENR               | 0.843 ± 0.140 mm ( 1.085 – 0.668 mm, n = 9)                          | 16.6 |
|            |                                                       | SNE               | 0.974 ± 0.144 mm (1.187 – 0.654 mm, n = 11)                          | 14.8 |

795

## 796 References

- 797 1. Ratuski AS, Weary DM. Environmental Enrichment for Rats and Mice Housed in Laboratories :  
 798 A Metareview. 2022;
- 799 2. Mieske P, Hobbiesiefken U, Fischer-Tenhagen C, Heintl C, Hohlbaum K, Kahnau P, et al. Bored  
 800 at home?—A systematic review on the effect of environmental enrichment on the welfare of  
 801 laboratory rats and mice. *Front Vet Sci* [Internet]. 2022;9. doi: 10.3389/fvets.2022.899219
- 802 3. Hobbiesiefken U, Mieske P, Lewejohann L, Diederich K. Evaluation of different types of  
 803 enrichment - their usage and effect on home cage behavior in female mice. *PLoS One*  
 804 [Internet]. 2021;16(12):e0261876. doi: 10.1371/journal.pone.0261876

- 805 4. Olsson IAS, Sherwin CM. Behaviour of laboratory mice in different housing conditions  
806 when allowed to self-administer an anxiolytic. *Lab Anim.* 2006 Oct;40(4):392–9. doi:  
807 10.1258/002367706778476389
- 808 5. Bailoo JD, Murphy E, Boada-Saña M, Varholick JA, Hintze S, Baussière C, et al. Effects of cage  
809 enrichment on behavior, welfare and outcome variability in female mice. *Front Behav*  
810 *Neurosci.* 2018;12. doi: 10.3389/fnbeh.2018.00232
- 811 6. Würbel H, Chapman R, Rutland C. Effect of feed and environmental enrichment on  
812 development of stereotypic wire-gnawing in laboratory mice. *Appl Anim Behav Sci.* 1998  
813 Oct;60(1):69–81. doi: 10.1016/S0168-1591(98)00150-6
- 814 7. Jones MA, Mason G, Pillay N. Early environmental enrichment protects captive-born striped  
815 mice against the later development of stereotypic behaviour. *Appl Anim Behav Sci [Internet].*  
816 2011;135(1–2):138–45. doi: 10.1016/j.applanim.2011.08.015
- 817 8. Bahi A. Environmental enrichment reduces chronic psychosocial stress-induced anxiety and  
818 ethanol-related behaviors in mice. *Prog Neuropsychopharmacol Biol Psychiatry.* 2017  
819 Jul;77:65–74. doi: 10.1016/j.pnpbp.2017.04.001
- 820 9. Hendershott TR, Cronin ME, Langella S, McGuinness PS, Basu AC. Effects of environmental  
821 enrichment on anxiety-like behavior, sociability, sensory gating, and spatial learning in male  
822 and female C57BL/6J mice. *Behav Brain Res.* 2016 Nov;314:215–25. doi:  
823 10.1016/j.bbr.2016.08.004
- 824 10. Varman DR, Rajan KE. Environmental Enrichment Reduces Anxiety by Differentially  
825 Activating Serotonergic and Neuropeptide Y (NPY)-Ergic System in Indian Field Mouse (*Mus*  
826 *booduga*): An Animal Model of Post-Traumatic Stress Disorder. *PLoS One.* 2015 May;10(5).  
827 doi: 10.1371/journal.pone.0127945
- 828 11. Simonetti T, Lee H, Bourke M, Leamey CA, Sawatari A. Enrichment from birth accelerates the

- 829 functional and cellular development of a motor control area in the mouse. *PLoS One*. 2009  
830 Aug;4(8). doi: 10.1371/journal.pone.0006780
- 831 12. Rabadan R, Ramos-Campos M, Redolat R, Mesa-Gresa P. Physical activity and environmental  
832 enrichment: Behavioural effects of exposure to different housing conditions in mice. *Acta*  
833 *Neurobiol Exp (Wars)* [Internet]. 2019;79(4):374–85. doi: 10.21307/ane-2019-035
- 834 13. Diamond MC, Law F, Rhodes H, Lindner B, Rosenzweig MR, Krech D, et al. Increases in cortical  
835 depth and glia numbers in rats subjected to enriched environment. *J Comp Neurol*.  
836 1966;128(1):117–25. doi: 10.1002/cne.901280110
- 837 14. Kempermann G, Kuhn HG, Gage FH. More hippocampal neurons in adult mice living in an  
838 enriched environment. *Nature*. 1997;386(6624):493–5. doi: 10.1038/386493a0
- 839 15. Akre AK, Bakken M, Hovland AL, Palme R, Mason G. Clustered environmental enrichments  
840 induce more aggression and stereotypic behaviour than do dispersed enrichments in female  
841 mice. *Appl Anim Behav Sci* [Internet]. 2011;131(3–4):145–52. doi:  
842 10.1016/j.applanim.2011.01.010
- 843 16. Cait J, Cait A, Scott RW, Winder CB, Mason GJ. Conventional laboratory housing increases  
844 morbidity and mortality in research rodents: results of a meta-analysis. *BMC Biol*.  
845 2022;20(1):1–22. doi: 10.1186/s12915-021-01184-0
- 846 17. Baumans V, Van Loo PLP. How to improve housing conditions of laboratory animals: The  
847 possibilities of environmental refinement. *Vet J* [Internet]. 2013;195(1):24–32. doi:  
848 10.1016/j.tvjl.2012.09.023
- 849 18. Körholz JC, Zocher S, Grzyb AN, Morisse B, Poetzsch A, Ehret F, et al. Selective increases in  
850 inter-individual variability in response to environmental enrichment in female mice. *Elife*.  
851 2018;7. doi: 10.7554/eLife.35690
- 852 19. Augustsson H, van de Weerd HA, Kruitwagen C, Baumans V. Effect of enrichment on variation

- 853 and results in the light/dark test. *Lab Anim.* 2003 Oct;37(4):328–40. doi:  
854 [10.1258/002367703322389898](https://doi.org/10.1258/002367703322389898)
- 855 20. Clipperton-Allen AE, Ingrao JC, Ruggiero L, Batista L, Ovari J, Hammermueller J, et al. Long-  
856 Term Provision of Environmental Resources Alters Behavior but not Physiology or  
857 Neuroanatomy of Male and Female BALB/c and C57BL/6 Mice. *J Am Assoc Lab Anim Sci.* 2015  
858 Nov;54(6):718–30.
- 859 21. Mieske P, Diederich K, Lewejohann L. Roaming in a land of milk and honey: Life trajectories  
860 and metabolic rate of female inbred mice living in a semi naturalistic environment. *Animals.*  
861 2021;11(10). doi: [10.3390/ani11103002](https://doi.org/10.3390/ani11103002)
- 862 22. Freund J, Brandmaier AM, Lewejohann L, Kirste I, Kritzler M, Krüger A, et al. Emergence of  
863 individuality in genetically identical mice. *Science* (80- ). 2013;340(6133):756–9. doi:  
864 [10.1126/science.1235294](https://doi.org/10.1126/science.1235294)
- 865 23. Freund J, Brandmaier AM, Lewejohann L, Kirste I, Kritzler M, Krüger A, et al. Association  
866 between exploratory activity and social individuality in genetically identical mice living in the  
867 same enriched environment. *Neuroscience.* 2015;309(May):140–52. doi:  
868 [10.1016/j.neuroscience.2015.05.027](https://doi.org/10.1016/j.neuroscience.2015.05.027)
- 869 24. Kritzler M, Lewejohann L, Krüger A. Analysing movement and behavioural patterns of  
870 laboratory mice in a semi natural environment based on data collected via RFID-technology.  
871 In: *CEUR Workshop Proceedings.* 2007. p. 17–28.
- 872 25. Kritzler M, Lewejohann L, Krueger A, Raubal M, Sachser N. An RFID-based Tracking System for  
873 Laboratory Mice in a Semi Natural Environment. *Proc PTA [Internet].* 2006;
- 874 26. Lewejohann L, Reefmann N, Widmann P, Ambrée O, Herring A, Keyvani K, et al. Transgenic  
875 Alzheimer mice in a semi-naturalistic environment: More plaques, yet not compromised in  
876 daily life. *Behav Brain Res [Internet].* 2009;201(1):99–102. doi: [10.1016/j.bbr.2009.01.037](https://doi.org/10.1016/j.bbr.2009.01.037)

- 877 27. Lewejohann L, Hoppmann AM, Kegel P, Kritzler M, Krüger A, Sachser N. Behavioral  
878 phenotyping of a murine model of Alzheimer’s disease in a seminaturalistic environment  
879 using RFID tracking. *Behav Res Methods*. 2009;41(3):850–6. doi: 10.3758/BRM.41.3.850
- 880 28. Christian JC, Yu PL, Slemenda CW, Johnston CC. Heritability of bone mass: A longitudinal study  
881 in aging male twins. *Am J Hum Genet*. 1989;44(3):429–33.
- 882 29. Kröger H, Kotaniemi A, Kröger L, Alhava E. Development of bone mass and bone density of the  
883 spine and femoral neck — a prospective study of 65 children and adolescents. *Bone Miner*.  
884 1993;23(3):171–82. doi: 10.1016/S0169-6009(08)80094-3
- 885 30. Lewejohann L, Zipser B, Sachser N. “Personality” in laboratory mice used for biomedical  
886 research: A way of understanding variability? *Dev Psychobiol*. 2011;53(6):624–30. doi:  
887 10.1002/dev.20553
- 888 31. Tokuyama K, Saito M, Okuda H. Effects of wheel running on food intake and weight gain of  
889 male and female rats. *Physiol Behav*. 1982;28(5):899–903. doi: 10.1016/0031-9384(82)90211-  
890 6
- 891 32. Cordeira J, Monahan D. Voluntary wheel running reduces weight gain in mice by decreasing  
892 high-fat food consumption. *Physiol Behav* [Internet]. 2019;207(April):1–6. doi:  
893 10.1016/j.physbeh.2019.04.019
- 894 33. Swallow JG, Koteja P, Carter PA, Garland T. Artificial selection for increased wheel-running  
895 activity in house mice results in decreased body mass at maturity. *J Exp Biol*.  
896 1999;202(18):2513–20. doi: 10.1242/jeb.202.18.2513
- 897 34. Würbel H, Chapman R, Rutland C. Effect of feed and environmental enrichment on  
898 development of stereotypic wire-gnawing in laboratory mice. *Appl Anim Behav Sci* [Internet].  
899 1998;60(1):69–81. doi: 10.1016/S0168-1591(98)00150-6
- 900 35. Kaye M, Kusy RP. Genetic lineage, bone mass, and physical activity in mice. *Bone*.



- 901 1995;17(2):131–5. doi: 10.1016/S8756-3282(00)00164-2
- 902 36. Brooks BYS V, Faulkner J a. Contractile properties of skeletal muscles from young, adult and  
903 aged mice. *Physiology*. 1988;404:71–82. doi: 10.1113/jphysiol.1988.sp017279
- 904 37. Reisz-Porszasz S, Bhasin S, Artaza JN, Shen R, Sinha-Hikim I, Hogue A, et al. Lower skeletal  
905 muscle mass in male transgenic mice with muscle-specific overexpression of myostatin. *Am J*  
906 *Physiol - Endocrinol Metab*. 2003;285(4 48-4):876–88. doi: 10.1152/ajpendo.00107.2003
- 907 38. McPherron C, Lawler M, Lee SJ. Regulation of skeletal muscle mass in mice by a new TGF-beta  
908 superfamily member. *Nature*. 1997;387(May):83–90. doi: 10.1038/387083a0
- 909 39. Takeshita H, Yamamoto K, Nozato S, Inagaki T, Tsuchimochi H, Shirai M, et al. Modified  
910 forelimb grip strength test detects aging-associated physiological decline in skeletal muscle  
911 function in male mice. *Sci Rep*. 2017;7(February):1–9. doi: 10.1038/srep42323
- 912 40. Kelly SA, Czech PP, Wight JT, Blank KM, Garland Jr. T. Experimental evolution and phenotypic  
913 plasticity of hindlimb bones in high-activity house mice. *J Morphol [Internet]*.  
914 2006;267(3):360–74. doi: <https://doi.org/10.1002/jmor.10407>
- 915 41. Shapses SA, Sukumar D. Bone metabolism in obesity and weight loss. *Annu Rev Nutr*. 2012  
916 Aug;32:287–309. doi: 10.1146/annurev.nutr.012809.104655
- 917 42. Hoshi A, Watanabe H, Chiba M, Inaba Y. Effects of Exercise at Different Ages on Bone Density  
918 and Mechanical Properties of Femoral Bone of Aged Mice. Vol. 185, *Tohoku Journal of*  
919 *Experimental Medicine*. 1998. p. 15–24. doi: 10.1620/tjem.185.15
- 920 43. Kodama Y, Umemura Y, Nagasawa S, Beamer WG, Donahue LR, Rosen CR, et al. Exercise and  
921 mechanical loading increase periosteal bone formation and whole bone strength in C57BL/6J  
922 mice but not in C3H/HeJ mice. *Calcif Tissue Int*. 2000;66(4):298–306. doi:  
923 10.1007/s002230010060
- 924 44. Karabulut M, Bembem DA, Sherk VD, Anderson MA, Abe T, Michael GB. Effects of high-

- 925 intensity resistance training and low-intensity resistance training with vascular restriction on  
926 bone markers in older men. *Eur J Appl Physiol.* 2011;111(8):1659–67. doi: 10.1007/s00421-  
927 010-1796-9
- 928 45. Yusni Y, Rahman S. The effect of chronic exercise on a biomarker of bone resorption in healthy  
929 adults. *Fam Med Prim Care Rev.* 2019;21(3):270–6. doi: 10.5114/fmpcr.2019.88387
- 930 46. Tan SD, de Vries TJ, Kuijpers-Jagtman AM, Semeins CM, Everts V, Klein-Nulend J. Osteocytes  
931 subjected to fluid flow inhibit osteoclast formation and bone resorption. *Bone.*  
932 2007;41(5):745–51. doi: 10.1016/j.bone.2007.07.019
- 933 47. Gombos GC, Bajsz V, Pék E, Schmidt B, Sió E, Molics B, et al. Direct effects of physical training  
934 on markers of bone metabolism and serum sclerostin concentrations in older adults with low  
935 bone mass. *BMC Musculoskelet Disord [Internet].* 2016;17(1):1–8. doi: 10.1186/s12891-016-  
936 1109-5
- 937 48. Faienza MF, Lassandro G, Chiarito M, Valente F, Ciaccia L, Giordano P. How physical activity  
938 across the lifespan can reduce the impact of bone ageing: A literature review. *Int J Environ Res*  
939 *Public Health.* 2020;17(6):1–9. doi: 10.3390/ijerph17061862
- 940 49. Richter H, Ambrée O, Lewejohann L, Herring A, Keyvani K, Paulus W, et al. Wheel-running in a  
941 transgenic mouse model of Alzheimer’s disease: Protection or symptom? *Behav Brain Res.*  
942 2008;190(1):74–84. doi: 10.1016/j.bbr.2008.02.005
- 943 50. Selman C, Lumsden S, Bünger L, Hill WG, Speakman JR. Resting metabolic rate and  
944 morphology in mice (*Mus musculus*) selected for high and low food intake. *J Exp Biol.*  
945 2001;204(4):777–84. doi: 10.1242/jeb.204.4.777
- 946 51. Mount LE, Willmott J V. The relation between spontaneous activity, metabolic rate and the 24  
947 hour cycle in mice at different environmental temperatures. *J Physiol.* 1967;190(2):371–80.  
948 doi: 10.1113/jphysiol.1967.sp008215

- 949 52. Gordon CJ. The mouse thermoregulatory system: Its impact on translating biomedical data to  
950 humans. *Physiol Behav* [Internet]. 2017;179:55–66. doi: 10.1016/j.physbeh.2017.05.026
- 951 53. Touma C, Palme R, Sachser N. Analyzing corticosterone metabolites in fecal samples of mice:  
952 A noninvasive technique to monitor stress hormones. *Horm Behav*. 2004;45(1):10–22. doi:  
953 10.1016/j.yhbeh.2003.07.002
- 954 54. Palme R. Non-invasive measurement of glucocorticoids: Advances and problems. *Physiol*  
955 *Behav* [Internet]. 2019;199:229–43. doi: 10.1016/j.physbeh.2018.11.021
- 956 55. Touma C, Sachser N, Möstl E, Palme R. Effects of sex and time of day on metabolism and  
957 excretion of corticosterone in urine and feces of mice. *Gen Comp Endocrinol*.  
958 2003;130(3):267–78. doi: 10.1016/S0016-6480(02)00620-2
- 959 56. Good T, Khan MZ, Lynch JW. Biochemical and physiological validation of a corticosteroid  
960 radioimmunoassay for plasma and fecal samples in oldfield mice (*Peromyscus polionotus*).  
961 *Physiol Behav*. 2003;80(2–3):405–11. doi: 10.1016/j.physbeh.2003.09.006
- 962 57. Sakakibara H, Koyanagi A, Suzuki TA, Suzuki A, Ling L, Shimoi K. Effects of animal care  
963 procedures on plasma corticosterone levels in group-housed mice during the nocturnal active  
964 phase. *Exp Anim*. 2010;59(5):637–42. doi: 10.1538/expanim.59.637
- 965 58. Meyer N, Kröger M, Thümmler J, Tietze L, Palme R, Touma C. Impact of three commonly used  
966 blood sampling techniques on the welfare of laboratory mice: Taking the animal’s perspective.  
967 *PLoS One*. 2020;15(9 september):1–23. doi: 10.1371/journal.pone.0238895
- 968 59. Madetoja J, Madetoja M, Mäkinen J, Riuttala E, Jokinen J. Blood sampling from the tail vein, in  
969 comparison with two other techniques, causes less stress to mice. *Scand J Lab Anim Sci*.  
970 2009;36(2):215–21.
- 971 60. Bailoo JD, Murphy E, Boada-Saña M, Varholick JA, Hintze S, Baussière C, et al. Effects of Cage  
972 Enrichment on Behavior, Welfare and Outcome Variability in Female Mice. *Front Behav*

- 973           Neurosci [Internet]. 2018 Oct;12. doi: 10.3389/fnbeh.2018.00232
- 974   61.   Singhal G, Morgan J, Jawahar MC, Corrigan F, Jaehne EJ, Toben C, et al. The effects of short-  
975       term and long-term environmental enrichment on locomotion, mood-like behavior, cognition  
976       and hippocampal gene expression. Behav Brain Res [Internet]. 2019;368:111917. doi:  
977       10.1016/j.bbr.2019.111917
- 978   62.   Goodrick CL, Ingram DK, Reynolds MA, Freeman JR, Cider N. Effects of intermittent feeding  
979       upon body weight and lifespan in inbred mice: interaction of genotype and age. Mech Ageing  
980       Dev. 1990;55(1):69–87. doi: 10.1016/0047-6374(90)90107-Q
- 981   63.   Reed DR, Bachmanov AA, Tordoff MG. Forty mouse strain survey of body composition. Physiol  
982       Behav. 2007;91(5):593–600. doi: 10.1016/j.physbeh.2007.03.026
- 983   64.   Zhao W, Wiedemann P, Wölfel EM, Neven M, Peters S, Imhof T, et al. Decreased trabecular  
984       bone mass in Col22a1-deficient mice. Cells. 2021;10(11). doi: 10.3390/cells10113020
- 985   65.   Bouxsein ML, Boyd SK, Christiansen BA, Guldberg RE, Jepsen KJ, Müller R. Guidelines for  
986       assessment of bone microstructure in rodents using micro-computed tomography. J Bone  
987       Miner Res. 2010;25(7):1468–86. doi: 10.1002/jbmr.141
- 988   66.   Schinke T, Schilling AF, Baranowsky A, Seitz S, Marshall RP, Linn T, et al. Impaired gastric  
989       acidification negatively affects calcium homeostasis and bone mass. Nat Med.  
990       2009;15(6):674–81. doi: 10.1038/nm.1963
- 991   67.   Vollersen N, Zhao W, Rolvien T, Lange F, Schmidt FN, Sonntag S, et al. The WNT1G177C  
992       mutation specifically affects skeletal integrity in a mouse model of osteogenesis imperfecta  
993       type XV. Bone Res. 2021;9(1):1–13. doi: 10.1038/s41413-021-00170-0
- 994   68.   Nickerson DM, Facey DE, Grossman GD. Estimating Physiological Thresholds with Continuous  
995       Two-Phase Regression. Physiol Zool [Internet]. 1989;62(4):866–87. doi:  
996       10.1086/physzool.62.4.30157934

997 69. Bates D, Mächler M, Bolker BM, Walker SC. Fitting linear mixed-effects models using lme4. J  
 998 Stat Softw. 2015;67(1). doi: 10.18637/jss.v067.i01

999 **Table 1: summarized results of examined parameters and correlation analysis.** Shown is the age of the animals at the  
 1000 respective time of measurement and the value of the parameter for the animals from the three housing conditions CON,  
 1001 ENR and SNE housing. Values are shown as the mean with the standard deviation (SD) and the coefficient of variance (CV).  
 1002 The housing condition showing the lowest CV is marked in the CV column in respective to the used color scheme (CON  
 1003 black, ENR light blue, SNE green). If a correlation analysis with another measured value was made, it is marked as the  
 1004 correlating parameter and the results are shown as the correlation factor *r* and the respective *p* value. If a correlation lead  
 1005 to a *p* value lower than 0.05, the correlation is marked gray.

| animal age | parameter              | housing condition | mean ± SD                                        | CV   | correlating parameter | corr. Factor <i>r</i> | <i>p</i> value |
|------------|------------------------|-------------------|--------------------------------------------------|------|-----------------------|-----------------------|----------------|
| days       |                        |                   |                                                  | %    |                       |                       |                |
| 340        | body weight            | CON               | 26.8 ± g                                         | 7.7  |                       |                       |                |
|            |                        | ENR               | 27.2 ± g                                         | 5.5  |                       |                       |                |
|            |                        | SNE               | 29.8 ± g                                         | 8.1  |                       |                       |                |
|            | bone density           | CON               | 1.51 ± 0.24 g cm <sup>-3</sup>                   | 15.6 | body weight           | 0.447                 | 0.168          |
|            |                        | ENR               | 1.69 ± 0.17 g cm <sup>-3</sup>                   | 16.5 |                       | 0.475                 | 0.119          |
|            |                        | SNE               | 1.72 ± 0.16 g cm <sup>-3</sup>                   | 16.0 |                       | 0.553                 | 0.011          |
| 501        | body weight            | CON               | 29.5 ± 3.4 g                                     | 11.6 |                       |                       |                |
|            |                        | ENR               | 32.1 ± 4.1 g                                     | 12.7 |                       |                       |                |
|            |                        | SNE               | 36.3 ± 3.2 g                                     | 8.9  |                       |                       |                |
|            | bone density           | CON               | 1.44 ± 0.15 g cm <sup>-3</sup>                   | 10.6 | body weight           | -0.027                | 0.937          |
|            |                        | ENR               | 1.58 ± 0.19 g cm <sup>-3</sup>                   | 12.0 |                       | 0.391                 | 0.234          |
|            |                        | SNE               | 1.57 ± 0.23 g cm <sup>-3</sup>                   | 14.4 |                       | 0.460                 | 0.047          |
| 508/510    | body weight            | CON               | 29.8 ± 3.7 g                                     | 12.3 |                       |                       |                |
|            |                        | ENR               | 31.1 ± 3.6 g                                     | 11.4 |                       |                       |                |
|            |                        | SNE               | 35.2 ± 3.0 g                                     | 8.6  |                       |                       |                |
|            | grip strength          | CON               | 2.29 ± 0.39 N                                    | 17.0 | bone density 501 days | -0.513                | 0.106          |
|            |                        | ENR               | 2.60 ± 0.41 N                                    | 15.6 |                       | 0.795                 | 0.003          |
|            |                        | SNE               | 2.38 ± 0.35 N                                    | 14.5 |                       | 0.323                 | 0.177          |
| 664        | body weight            | CON               | 29.4 ± 3.0 g                                     | 9.8  |                       |                       |                |
|            |                        | ENR               | 31.7 ± 2.9 g                                     | 9.0  |                       |                       |                |
|            |                        | SNE               | 35.0 ± 3.0 g                                     | 9.3  |                       |                       |                |
|            | bone density           | CON               | 1.21 ± 0.13 g cm <sup>-3</sup>                   | 10.8 | body weight           | 0.493                 | 0.123          |
|            |                        | ENR               | 1.38 ± 0.25 g cm <sup>-3</sup>                   | 17.8 |                       | 0.214                 | 0.528          |
|            |                        | SNE               | 1.35 ± 0.16 g cm <sup>-3</sup>                   | 12.2 |                       | 0.413                 | 0.100          |
|            | grip strength          | CON               | 2.34 ± 0.43 N                                    | 18.4 | bone density          | 0.240                 | 0.476          |
|            |                        | ENR               | 2.65 ± 0.26 N                                    | 9.8  |                       | -0.071                | 0.836          |
|            |                        | SNE               | 2.40 ± 0.40 N                                    | 16.6 |                       | -0.196                | 0.451          |
| 585 — 622  | resting metabolic rate | CON               | 42.5 ± 7.4 ml min <sup>-1</sup> kg <sup>-1</sup> | 17.4 | grip str. 664 d       | 0.018                 | 0.959          |
|            |                        | ENR               | 36.9 ± 4.5 ml min <sup>-1</sup> kg <sup>-1</sup> | 12.2 |                       | 0.221                 | 0.514          |
|            |                        | SNE               | 40.5 ± 3.4 ml min <sup>-1</sup> kg <sup>-1</sup> | 8.4  |                       | 0.565                 | 0.015          |
| 670        | body weight            | CON               | 30.4 ± 3.1 g                                     | 10.1 | RMR 585-622 d         | 0.326                 | 0.329          |
|            |                        | ENR               | 33.5 ± 3.1 g                                     | 9.2  |                       | 0.490                 | 0.126          |
|            |                        | SNE               | 34.6 ± 3.1 g                                     | 8.9  |                       | -0.301                | 0.224          |
|            | body length            | CON               | 9.7 ± 0.3 cm                                     | 2.8  | body weight           | 0.838                 | 0.001          |
|            |                        | ENR               | 10.1 ± 0.2 cm                                    | 2.2  |                       | -0.182                | 0.592          |
|            |                        | SNE               | 10.3 ± 0.2 cm                                    | 2.1  |                       | 0.685                 | 0.002          |
|            | weight/length          | CON               | 3.1 ± 0.3 g cm <sup>-1</sup>                     | 8.2  |                       |                       |                |
|            |                        | ENR               | 3.3 ± 0.4 g cm <sup>-1</sup>                     | 10.9 |                       |                       |                |
|            |                        | SNE               | 3.3 ± 0.3 g cm <sup>-1</sup>                     | 8.7  |                       |                       |                |

|                                       |       |                                     |      |                       |        |         |
|---------------------------------------|-------|-------------------------------------|------|-----------------------|--------|---------|
| retroperitoneal adipose tissue weight | CON   | 0.057 ± 0.032 g                     | 56.8 | body weight           | 0.729  | 0.011   |
|                                       | ENR   | 0.075 ± 0.019 g                     | 25.3 |                       | 0.874  | > 0.001 |
|                                       | SNE   | 0.112 ± 0.048 g                     | 43.1 |                       | 0.539  | 0.021   |
| Periovarian adipose tissue weight     | CON   | 0.276 ± 0.157 g                     | 56.9 | body weight           | 0.535  | 0.090   |
|                                       | ENR   | 0.409 ± 0.182 g                     | 44.5 |                       | 0.953  | > 0.001 |
|                                       | SNE   | 0.506 ± 0.236 g                     | 46.6 |                       | 0.582  | 0.011   |
| cortical thickness                    | CON   | 164.4 ± 23.2 μm                     | 14.1 |                       |        |         |
|                                       | ENR   | 169.5 ± 19.7 μm                     | 11.6 |                       |        |         |
|                                       | SNE   | 185.5 ± 24.5 μm                     | 13.2 |                       |        |         |
| femur length                          | CON   | 16.55 ± 0.15 mm                     | 0.9  |                       |        |         |
|                                       | ENR   | 16.67 ± 0.32 mm                     | 1.9  |                       |        |         |
|                                       | SNE   | 16.79 ± 0.28 mm                     | 1.7  |                       |        |         |
| femur midshaft outer diameter         | CON   | 1.76 ± 0.04 mm                      | 2.3  | bone density 664 days | 0.409  | 0.275   |
|                                       | ENR   | 1.77 ± 0.03 mm                      | 1.8  |                       | 0.127  | 0.745   |
|                                       | SNE   | 1.83 ± 0.04 mm                      | 2.3  |                       | 0.478  | 0.116   |
| femur bone volume/tissue volume       | CON   | 1.32 ± 0.78 %                       | 59.0 |                       |        |         |
|                                       | ENR   | 1.78 ± 1.09 %                       | 61.1 |                       |        |         |
|                                       | SNE   | 1.53 ± 1.10 %                       | 71.8 |                       |        |         |
| muscle weight                         | CON   | 0.123 ± 0.023 g                     | 19.0 | body weight           | 0.221  | 0.515   |
|                                       |       |                                     |      | grip str. 664 d       | -0.136 | 0.590   |
|                                       |       |                                     |      | RMR 585-622 d         | 0.313  | 0.348   |
|                                       | ENR   | 0.127 ± 0.021 g                     | 16.5 | body weight           | 0.055  | 0.872   |
|                                       |       |                                     |      | grip str. 664 d       | 0.077  | 0.823   |
|                                       |       |                                     |      | RMR 585-622 d         | -0.284 | 0.398   |
|                                       | SNE   | 0.120 ± 0.020 g                     | 16.3 | body weight           | 0.435  | 0.071   |
|                                       |       |                                     |      | grip str. 664 d       | 0.296  | 0.377   |
|                                       |       |                                     |      | RMR 585-622 d         | -0.409 | 0.092   |
| Myostatin concentration               | CON   | 692.26 ± 132.87 pg ml <sup>-1</sup> | 19.2 | muscle weight         | 0.026  | 0.191   |
|                                       | ENR   | 714.96 ± 107.04 pg ml <sup>-1</sup> | 15.0 |                       | 0.711  | 0.178   |
|                                       | SNE   | 692.26 ± 132.87 pg ml <sup>-1</sup> | 19.2 |                       | -0.323 | 0.939   |
| Osteocalcin concentration             | CON   | 4.77 ± 3.67 ng ml <sup>-1</sup>     | 77.0 | cortical thickness    | -0.180 | 0.642   |
|                                       |       |                                     |      | cortical porosity     | 0.376  | 0.319   |
|                                       | ENR   | 4.48 ± 2.96 ng ml <sup>-1</sup>     | 66.1 | cortical thickness    | -0.016 | 0.969   |
|                                       |       |                                     |      | cortical porosity     | -0.113 | 0.790   |
|                                       | SNE   | 5.18.26 ± 2.79 ng ml <sup>-1</sup>  | 53.8 | cortical thickness    | -0.721 | 0.008   |
| cortical porosity                     | 0.685 | 0.014                               |      |                       |        |         |
| CTX-1 concentration                   | CON   | 32.97 ± 7.20 ng ml <sup>-1</sup>    | 21.8 | cortical thickness    | -0.470 | 0.240   |
|                                       |       |                                     |      | cortical porosity     | 0.201  | 0.634   |
|                                       | ENR   | 31.00 ± 7.80 ng ml <sup>-1</sup>    | 25.2 | cortical thickness    | 0.278  | 0.505   |
|                                       |       |                                     |      | cortical porosity     | -0.213 | 0.613   |
|                                       | SNE   | 24.77 ± 4.38 ng ml <sup>-1</sup>    | 17.7 | cortical thickness    | -0.562 | 0.057   |
| cortical porosity                     | 0.602 | 0.038                               |      |                       |        |         |
| FCMs                                  | CON   | 2.53 ± 0.77 ng mg <sup>-1</sup>     | 30.5 |                       |        |         |
|                                       | ENR   | 2.73 ± 0.78 ng mg <sup>-1</sup>     | 28.5 |                       |        |         |
|                                       | SNE   | 1.94 ± 0.65 ng mg <sup>-1</sup>     | 33.6 |                       |        |         |
| corticosterone (V. facialis)          | CON   | 142.32 ± 93.33 ng ml <sup>-1</sup>  | 65.5 |                       |        |         |
|                                       | ENR   | 132.44 ± 81.47 ng ml <sup>-1</sup>  | 61.5 |                       |        |         |
|                                       | SNE   | 321.50 ± 139.66 ng ml <sup>-1</sup> | 43.3 |                       |        |         |
| corticosterone (perfusion)            | CON   | 136.95 ± 90.79 ng ml <sup>-1</sup>  | 66.3 |                       |        |         |
|                                       | ENR   | 78.95 ± 61.60 ng ml <sup>-1</sup>   | 78.0 |                       |        |         |
|                                       | SNE   | 163.47 ± 102.92 ng ml <sup>-1</sup> | 63.0 |                       |        |         |

1006
